# Supplementary material
Source: PubMed Central journal article supplement (PMC4364182)
Supplement: pnas.1424035112.sapp.pdf [file pnas.1424035112.sapp.pdf]

# Supporting Information Appendix

## Variability of stalagmite-inferred Indian Monsoon precipitation over the past 252,000 years

By Yanjun Cai et al.

### Table of Contents

|                                |    |
|--------------------------------|----|
| SI Materials and Methods ..... | 2  |
| Figure S1 .....                | 4  |
| Figure S2 .....                | 5  |
| Figure S3 .....                | 6  |
| Figure S4 .....                | 7  |
| Figure S5 .....                | 8  |
| Figure S6 .....                | 9  |
| Figure S7-a .....              | 10 |
| Figure S7-b .....              | 11 |
| Figure S8 .....                | 12 |
| Figure S9 .....                | 13 |
| Figure S10 .....               | 14 |
| Figure S11 .....               | 15 |
| References .....               | 16 |
| Table S1 .....                 | 18 |
| Table S2 .....                 | 21 |

## SI Materials and Methods

**The interpretation of XBL  $\delta^{18}\text{O}_c$ .** As explained in the main text, the amplitude of  $\delta^{18}\text{O}_c$  variations in the XBL speleothem implies a signal dominated by changes in precipitation  $\delta^{18}\text{O}_p$ , rather than a temperature effect alone. Each measurement of precipitation  $\delta^{18}\text{O}_p$  therefore reflects the cumulative history of precipitation and evaporation of water vapor en route to our site. Our interpretation can be simplified through the lens of Rayleigh distillation (1). If we consider an idealized parcel of water vapor that flows from the Bay of Bengal to XBL without any environmental mixing, the  $\delta^{18}\text{O}_v$  of the vapor should become isotopically depleted as a parcel rains out. In practice, Rayleigh distillation cannot be applied in regions with local recycling of vapor during transport or other fractionation processes such as the re-evaporation of raindrops, but the relatively dry terrain of the Yunnan Plateau and Northern Indochina Peninsula should be suitable for such an interpretation.

It is crucial to our proposed interpretation of the XBL record that the path from the Bay of Bengal to our site remains mostly fixed during LGM conditions, and that there are not significant changes in land cover en route. Model results show that the moisture source and transport route remained largely unchanged during the LGM (SI Appendix, Fig. S7; Fig. 4), and sea-land changes around the Bay of Bengal are minor, unlike the exposure of the Sunda Shelf to the southeast.

In an ideal scenario, another speleothem  $\delta^{18}\text{O}_c$  record would be available upstream of XBL, in which case the difference in  $\delta^{18}\text{O}_c$  between the two sites would reflect total rainout amount en route (2, 3). However, it is known that downwind  $\delta^{18}\text{O}_c$  records amplify the variability of changes upstream, a relation observed between the high-altitude Tibetan Plateau and low-altitude Indian Monsoon region in the Holocene (3). As a result, the rainout quantity revealed by subtracting two  $\delta^{18}\text{O}_c$  records should also be independently reflected in each of the individual records. Since precipitation over the Bay of Bengal should account for most precipitation en route, we argue that XBL  $\delta^{18}\text{O}_c$  functions as an index of rainfall over the Bay of Bengal. The good agreement ( $r=0.56$ ) of salinity record KL 126 from the northern Bay of Bengal (4) with XBL provides additional confirmation of this interpretation. We also observe good correlation in rain gauge data between June-July-August precipitation at XBL and precipitation over the Monsoon Region of India. We therefore conclude that XBL  $\delta^{18}\text{O}_c$  serves as a proxy of Indian Monsoon strength, defined as the intensity of rainfall over both the Bay of Bengal and the Monsoon Zone.

**The reliability of our isotope-enabled GCM simulations.** The model used in this paper is the National Center for Atmospheric Research (NCAR) Community Atmospheric Model version 2 (CAM2)(5), into which we have added a water-isotope module (6). The resolution of the atmospheric component of CAM2 is T42 (approximately  $2.8^\circ$  latitude x  $2.8^\circ$  longitude), with 26 vertical atmospheric layers from the surface up to 2 hPa. The water isotope module estimates fractionation associated with evaporation from the surface and in-situ evaporation and

condensation associated with cloud processes. A unique feature is the treatment of temperature- and drop-size dependent isotopic disequilibrium between vapor and raindrops. For the present-day run, the model was forced by climatological monthly mean sea surface temperatures derived from observations from 1949-2001. For the LGM run, continental ice sheet extent and topography was prescribed from the ICE-5G reconstruction (7), and atmospheric CO<sub>2</sub>, CH<sub>4</sub> and N<sub>2</sub>O concentrations of 185ppm, 350 ppb, and 220 ppb respectively were specified. Monthly SST and sea ice distributions were taken from a fully coupled Community Climate System Model (8).

The model is very similar to CAM3 employed in (9) and (10). The limitations of the atmospheric model and isotopic scheme are described by (6). Our LGM and present-day runs have also been previously used to interpret ice core data (11) and precipitation  $\delta^{18}\text{O}_p$  changes in South America (12). As is expected of a relatively coarse-resolution general circulation model, the modeled present-day precipitation and  $\delta^{18}\text{O}_p$  show biases relative to observations in the vicinity of the Tibetan Plateau. Similar to (9), our model yields reasonable simulations of large-scale circulation changes and can be used to interpret changes over East Asia.

Supplementary Figures

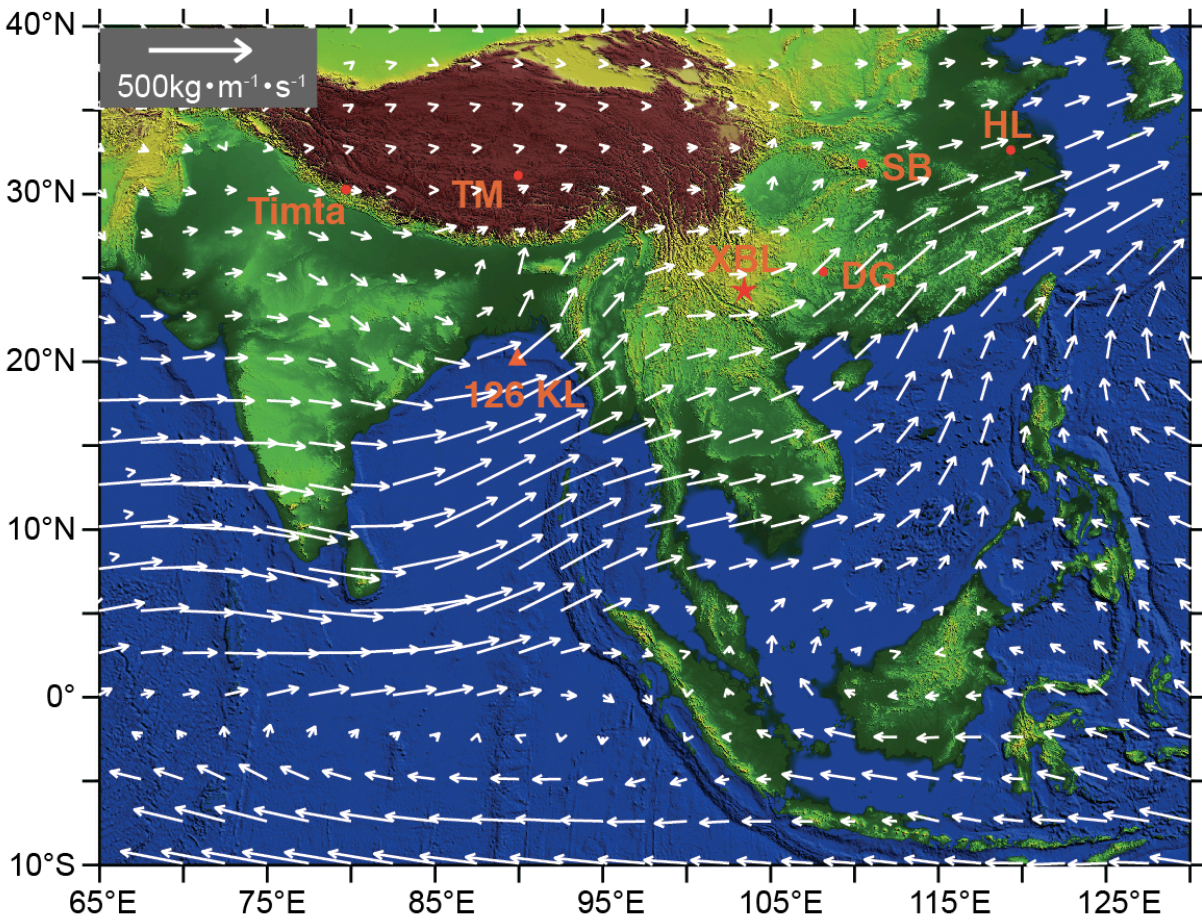

Figure S1. The location of Xiaobailong cave (XBL, red star,  $24^{\circ}12'N$ ,  $103^{\circ}21'E$ ) and present-day moisture transport patterns after the onset of monsoon ( $5^{\text{th}}$  pentad of May –  $2^{\text{nd}}$  pentad of July, averaged from 1990-1999, adapted from (13)). The locations of other cave sites are indicated by red solid circles: Hulu cave (HL)(14); Dongge cave (DG) (15,16); Sanbao and Linzhu Caves (SB)(17, 18); Tianmen cave (TM) (3, 19) in China; and Timta cave in India (20). The red triangle indicates the location of marine core 126KL (4).

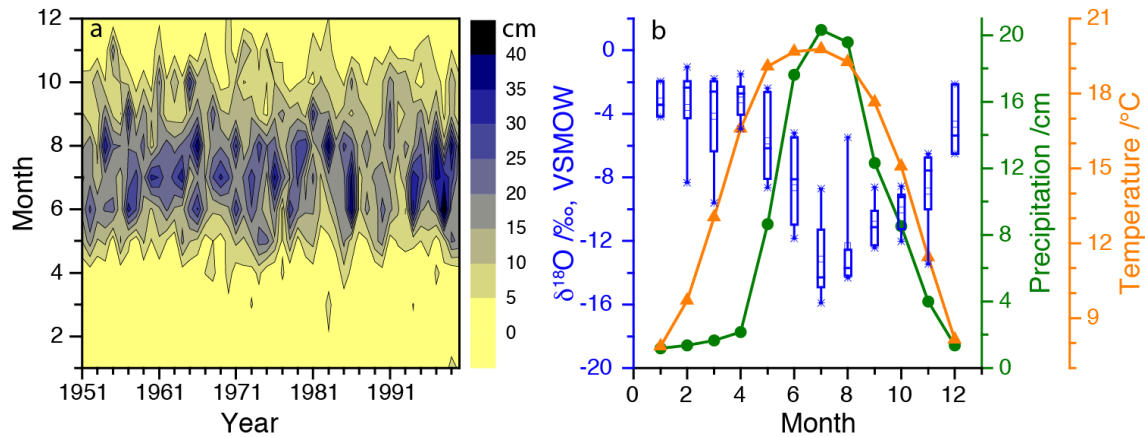

Figure S2. (a) Monthly precipitation for 1951-2000 observed at Kunming meteorological observatory, demonstrating that rainfall is concentrated between June and September. (b) Monthly mean precipitation (green solid circles), temperature (yellow triangles) and  $\delta^{18}\text{O}$  of precipitation (blue box-and-whisker diagram) at Kunming ( $25^{\circ}1' \text{N}$ ,  $102^{\circ}24' \text{E}$ ) meteorological observatory. The  $\delta^{18}\text{O}_p$  data are from the IAEA/WMO 2006 (<http://isohis.iaea.org>).

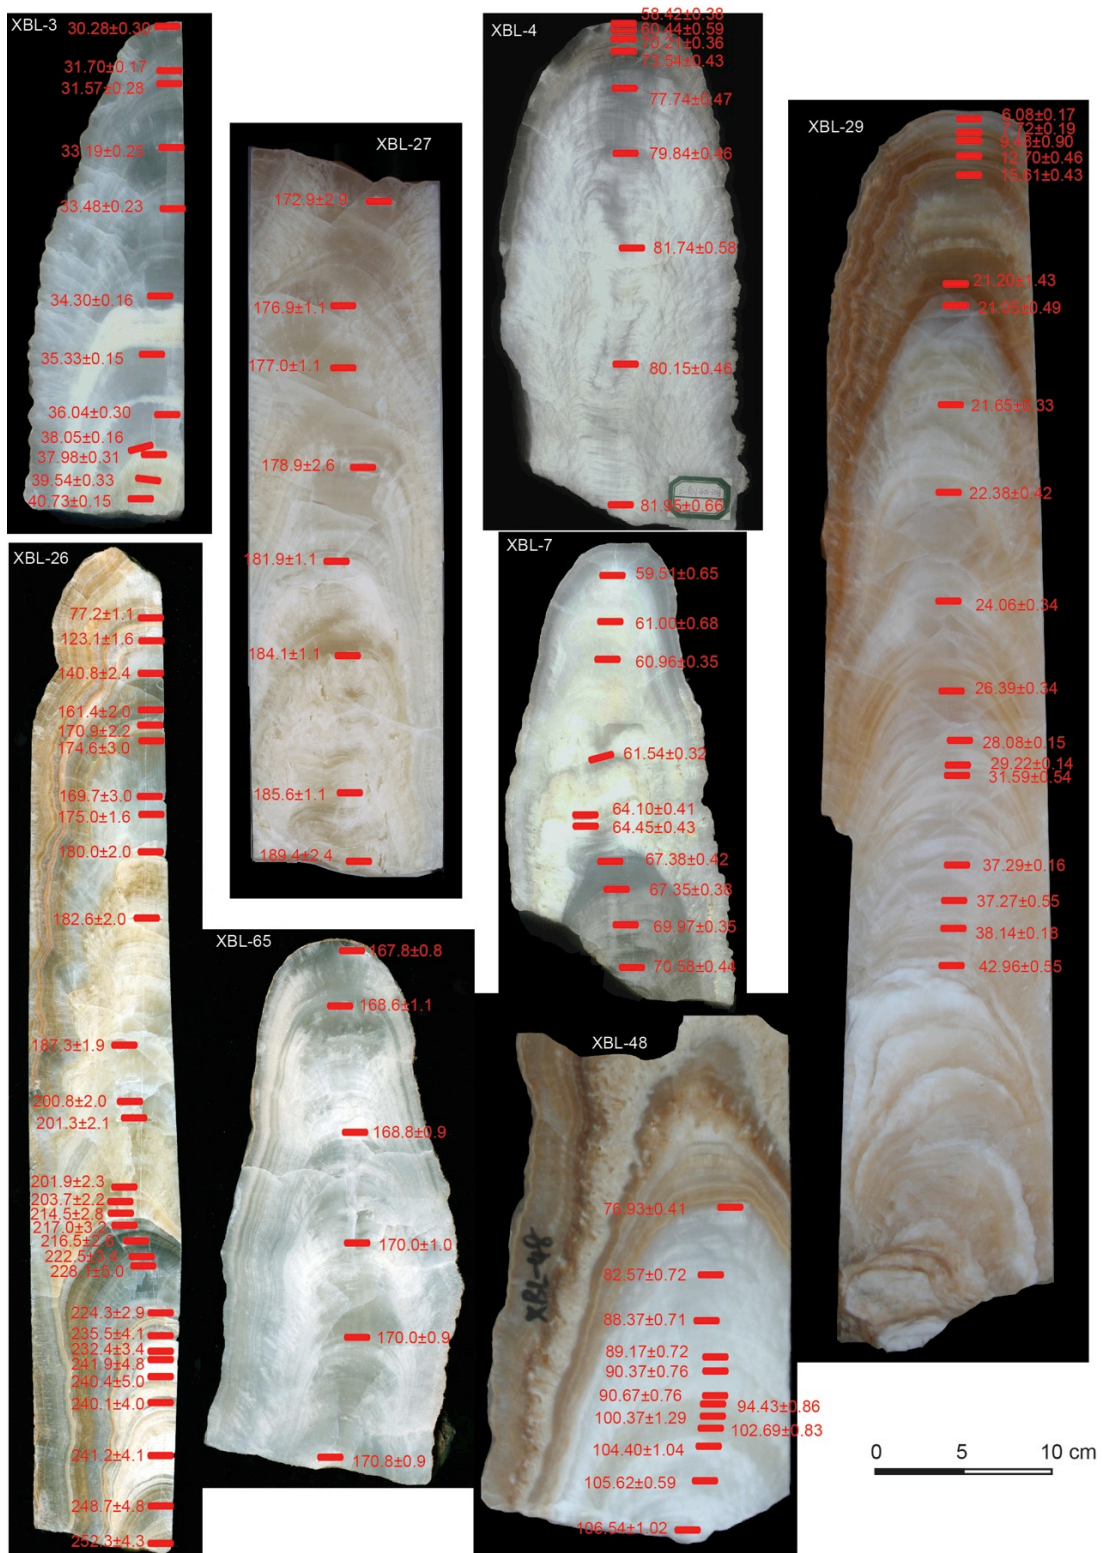

Figure S3. Images of stalagmites used to establish the XBL  $\delta^{18}O_e$  record. All  $^{230}Th$  dating positions are marked on the stalagmites with red rectangles, and ages (ka BP) are also labeled with  $2\sigma$  error.

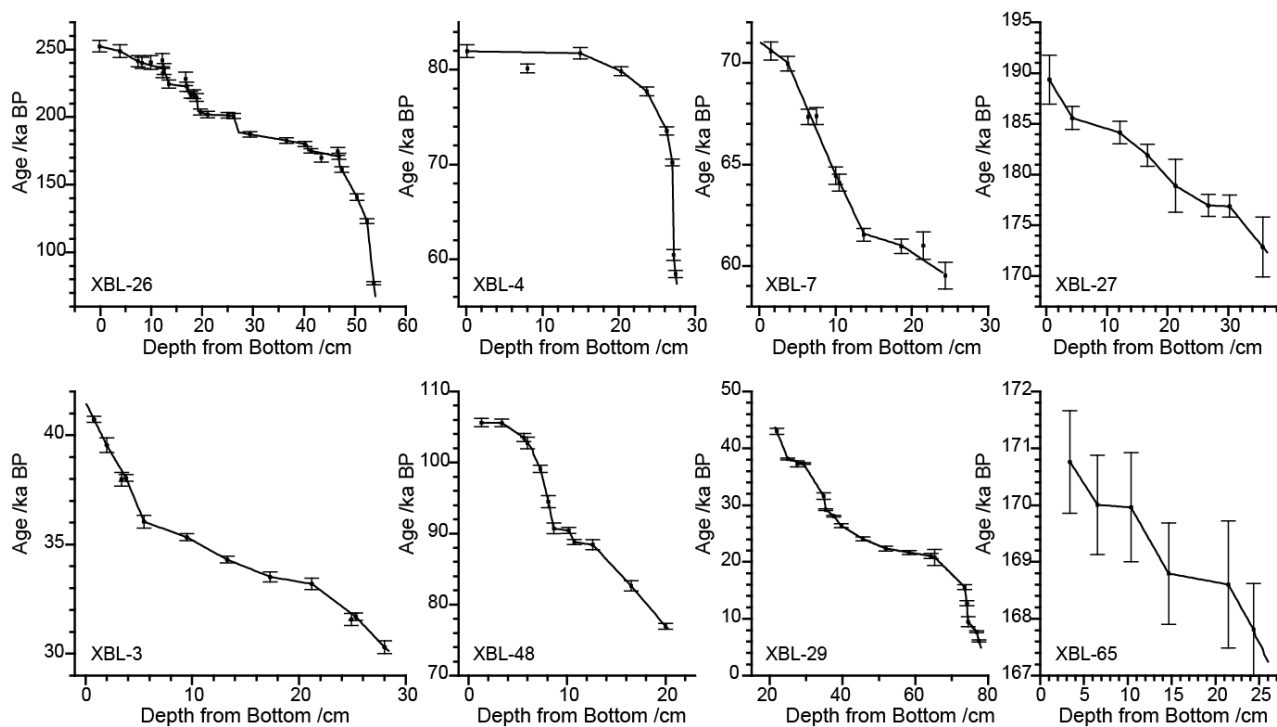

Figure S4. Plots of age versus depth for stalagmites XBL-3, XBL-4, XBL-7, XBL-26, XBL-27, XBL-29, XBL-48 and XBL-65 from Xiaobailong cave. All ages are reported in units of thousands of years before present (1950 AD), ka BP. The age errors indicated in the plots are  $2\sigma$  error. Linear interpolation is used to establish the chronology for each sample.

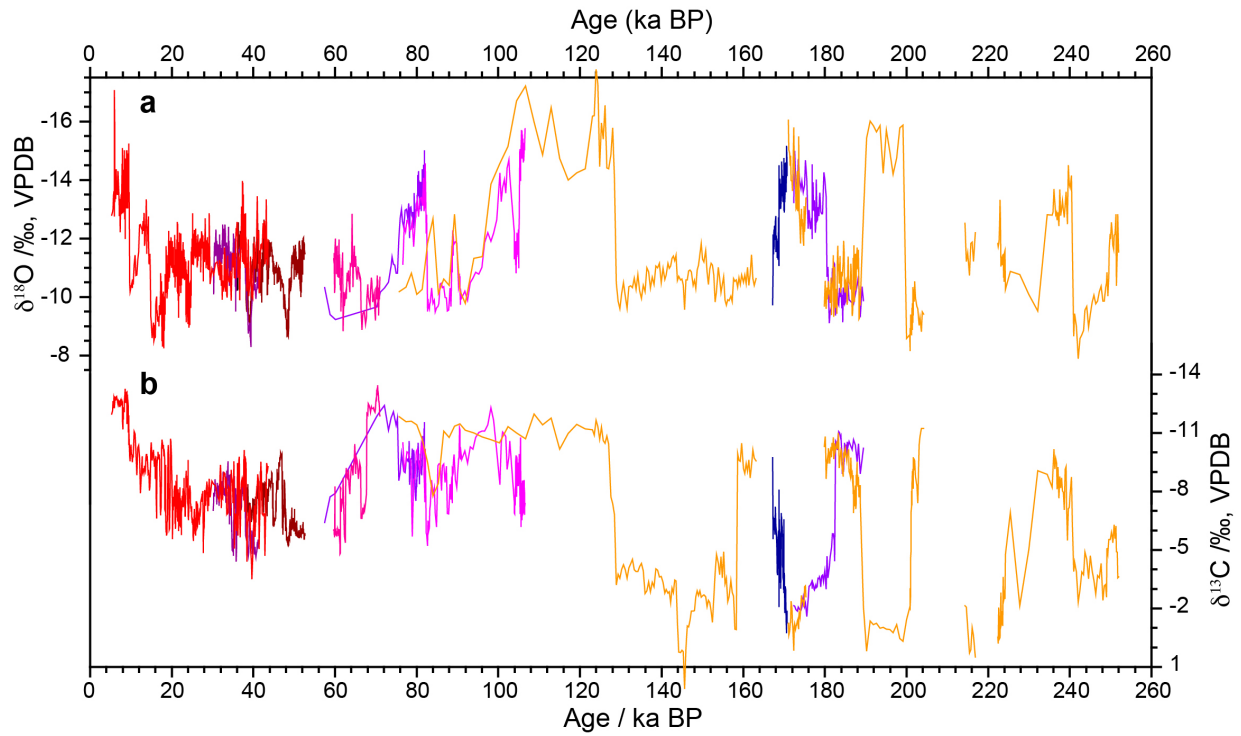

Figure S5. The time series of speleothem  $\delta^{18}\text{O}_c$  and  $\delta^{13}\text{C}$  obtained from Xiaobailong Cave. The different colors denote different stalagmites (the same as in Fig. 1). Replications in both  $\delta^{18}\text{O}_c$  and  $\delta^{13}\text{C}$  profiles indicate that the variations of  $\delta^{18}\text{O}_c$  are dominated by climate variations, i.e., changes in the oxygen isotopic composition of meteoric precipitation and cave temperature at the time of calcite precipitation.



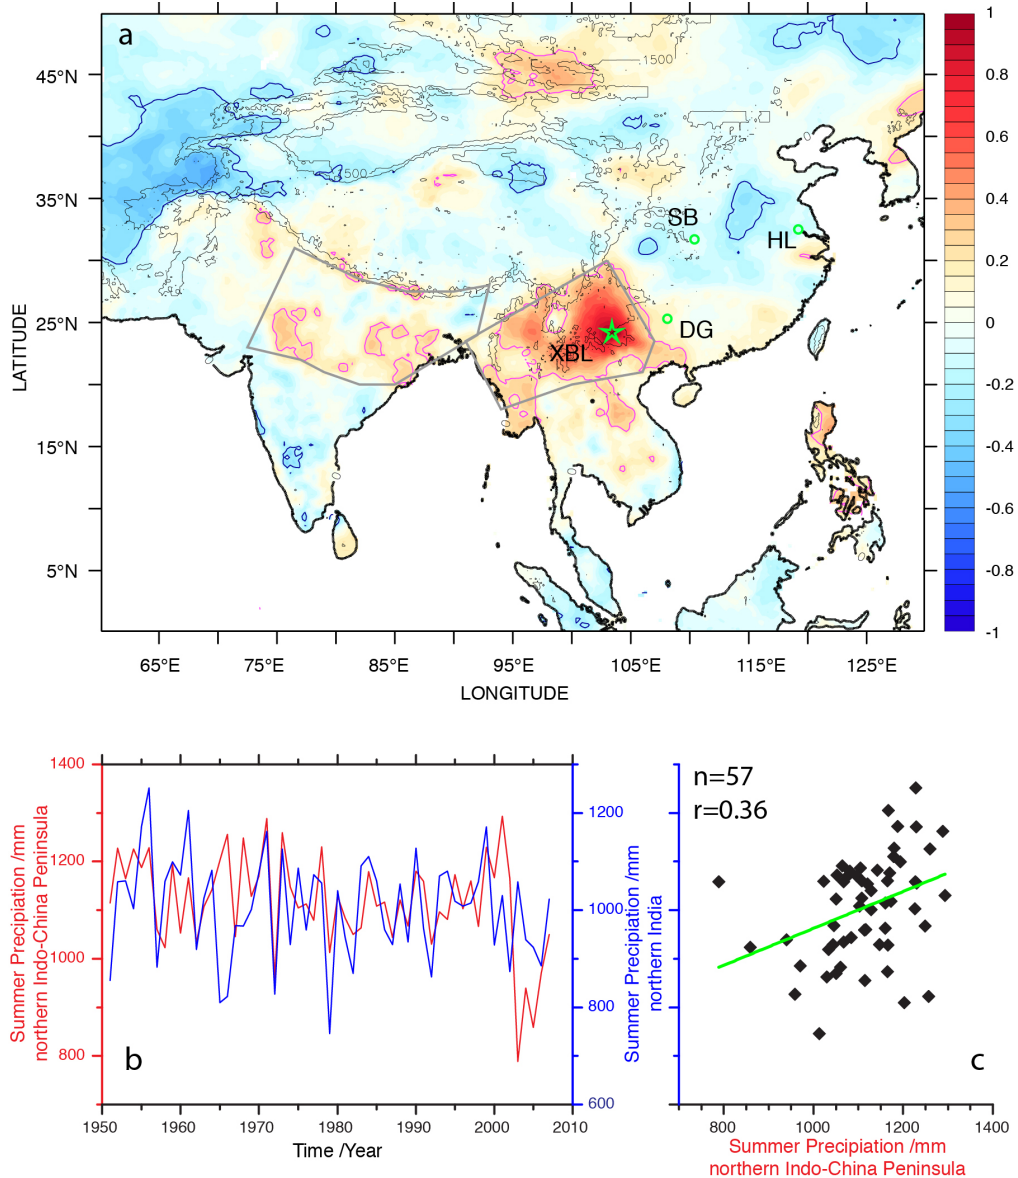

Figure S6. (a) Correlation between summer half-year (May to October) precipitation at XBL cave site and other regions during the period 1951-2007. The pink (blue) contour denotes the region of positive (negative) correlation above 95% confidence level. (b) Comparison of summer half-year average precipitation at northern India and northern Indo-China Peninsula (as denoted by gray polygons in panel a) from 1951-2007. (c) Precipitation of northern India versus that of northern Indo-China Peninsula, indicating the precipitations at these two regions are positively correlated. Data source: APHRODITE (Asian Precipitation - Highly-Resolved Observational Data Integration Towards Evaluation of Water Resources, APHRO\_MA\_V1101R2 product, (21)).

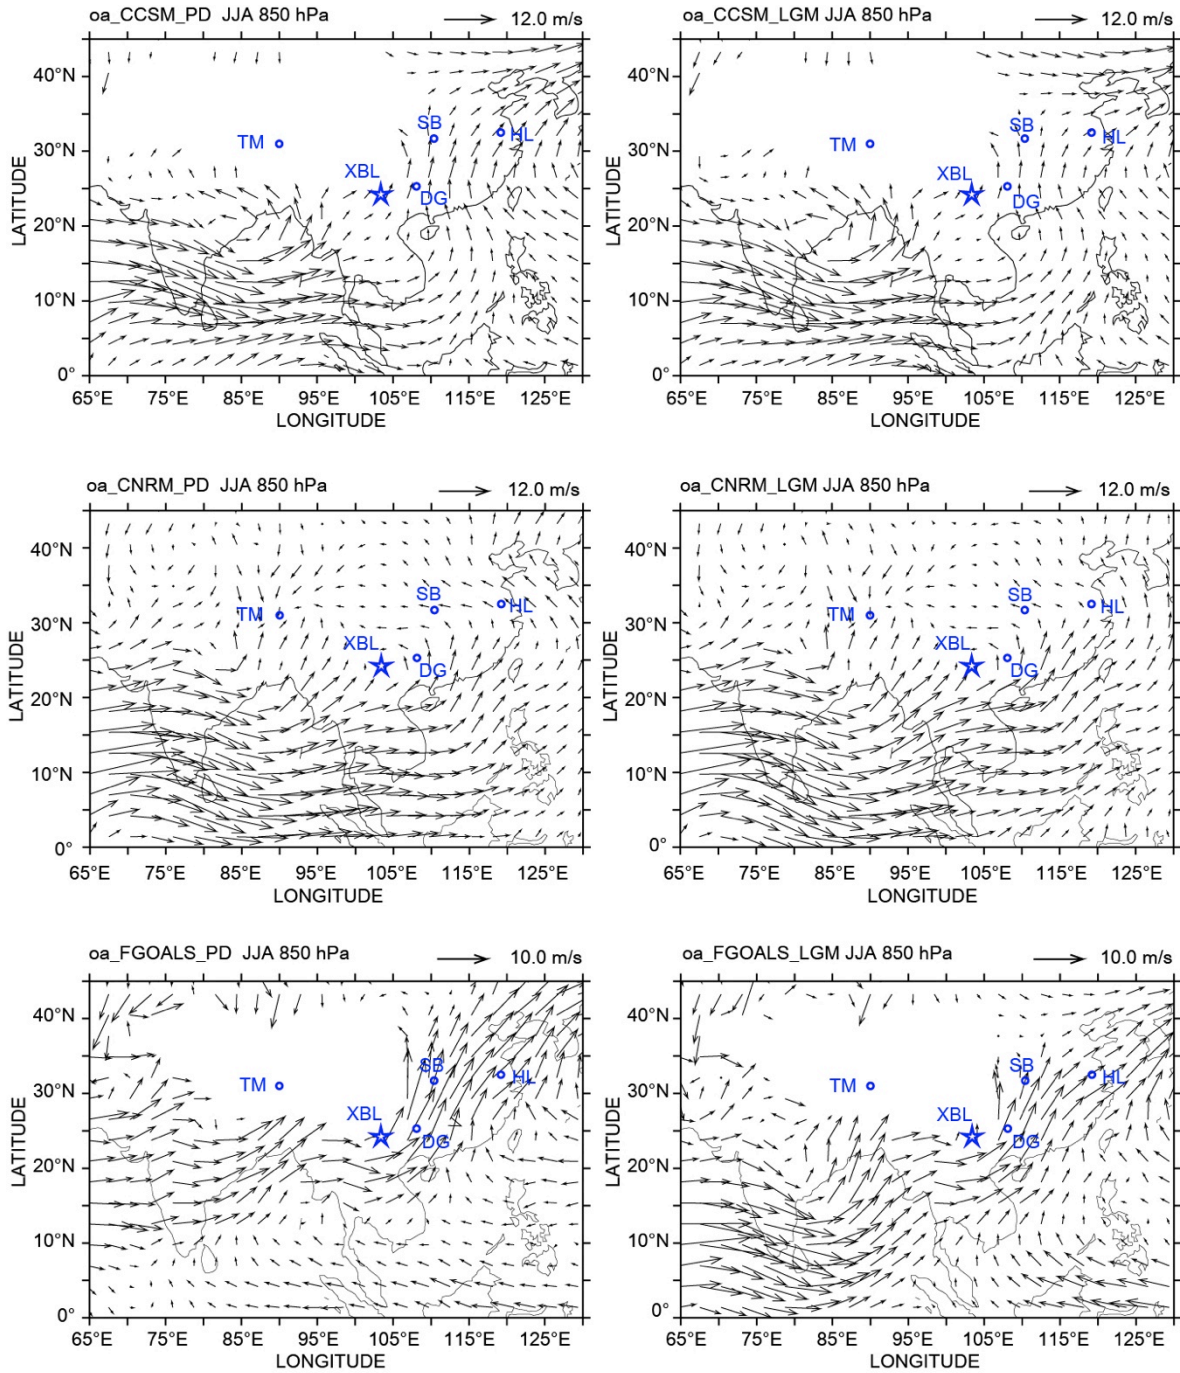

Figure S7-a. South Asia JJA 850 hPa wind for Present Day and the Last Glacial Maximum (LGM) in ocean-atmosphere coupled global circulation models (GCMs) from the PMIP2 (Paleoclimate Modeling Intercomparison Project, Phase II) database (22). Markers indicate the locations of the following caves: XBL, Xiaobailong cave; TM, Tianmen cave; SB, Sanbao cave; DG, Dongge cave; HL, Hulu cave. Comparing the LGM to Present Day, the wind field upstream of XBL cave does not show significant change in any of the models, indicating that the Bay of Bengal was the primary source of the moisture of the XBL cave.

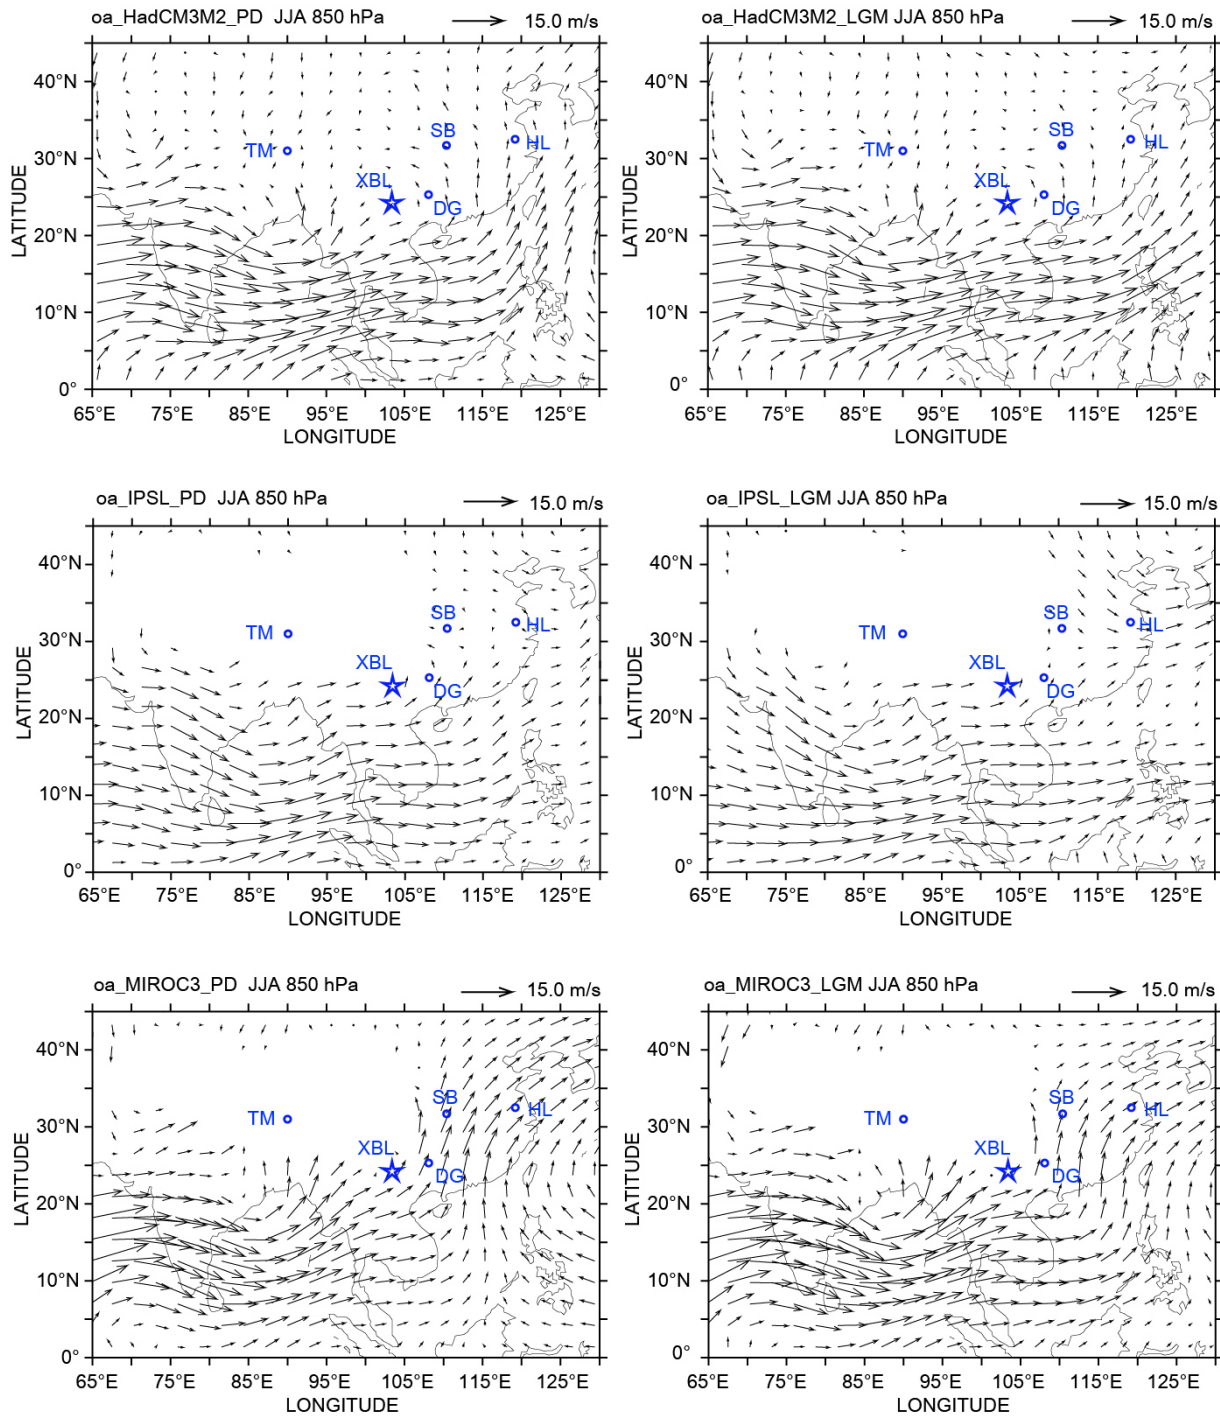

Figure S7-b. South Asia JJA 850 hPa wind for Present Day and the Last Glacial Maximum (LGM) in ocean-atmosphere coupled global circulation models (GCMs) from the PMIP2 (Paleoclimate Modeling Intercomparison Project, Phase II) database (22). Markers indicate the locations of the following caves: XBL, Xiaobailong cave; TM, Tianmen cave; SB, Sanbao cave; DG, Dongge cave; HL, Hulu cave. Comparing the LGM to Present Day, the wind field upstream of XBL cave does not show significant change in any of the models, indicating that the Bay of Bengal was the primary source of the moisture of the XBL cave.

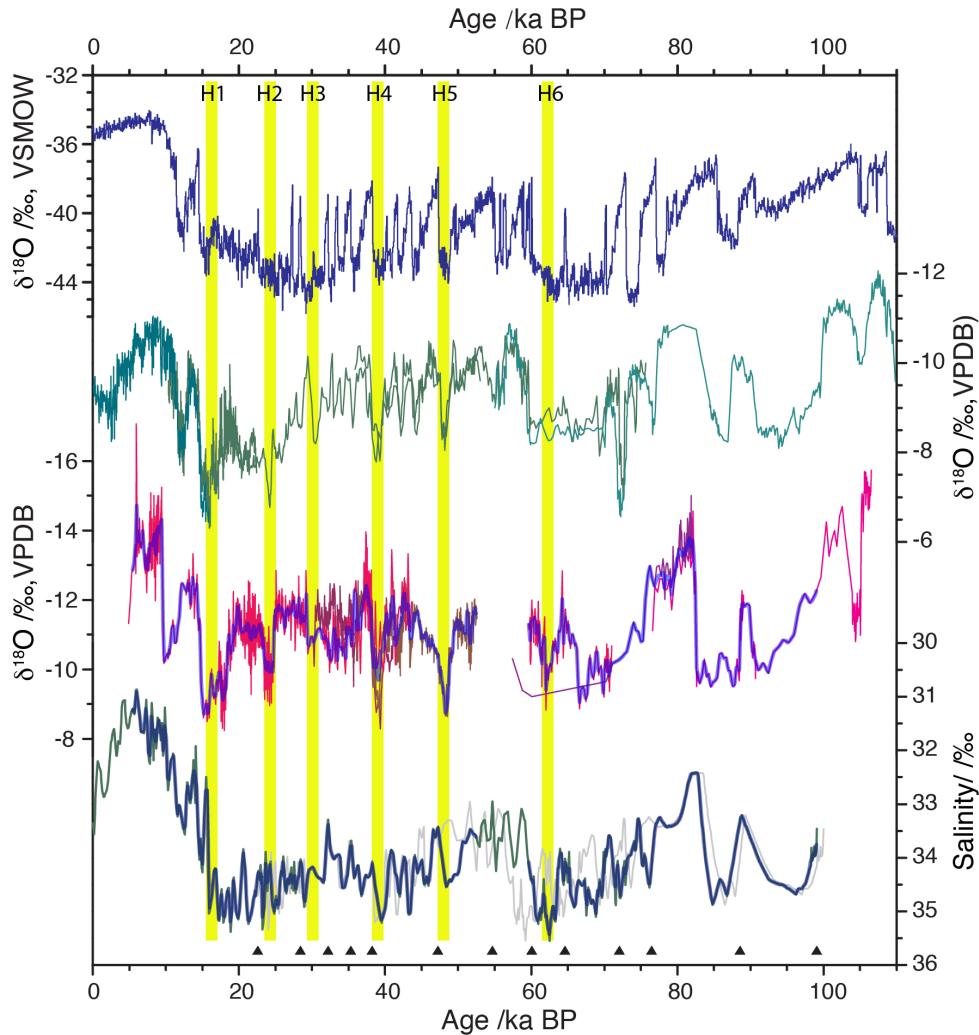

Figure S8. Comparison of speleothem  $\delta^{18}\text{O}_c$  records from Xiaobailong and Hulu-Dongge-Sanbao caves (17) with salinity records reconstructed from 126 KL, Bay of Bengal (4) and NGRIP ice core  $\delta^{18}\text{O}$  record (23) over the last 110 kyrs. The gray line in the salinity record uses the original published chronology while the green line is a new chronology tuned to the updated NGRIP ice core record. The triangles beneath the curve indicate the tie points. The yellow bars indicate the weak monsoon intervals coincident with cold Heinrich events in North Atlantic. There is a clear visual match between the XBL  $\delta^{18}\text{O}_c$  and the ODP 126 KL reconstructed salinity records and the two 200-yr smoothed records (blue thick lines) have a correlation coefficient of  $r=0.56$  ( $n=435$ ), indicating that a correlation exists between these two records on centennial to orbital time scales.

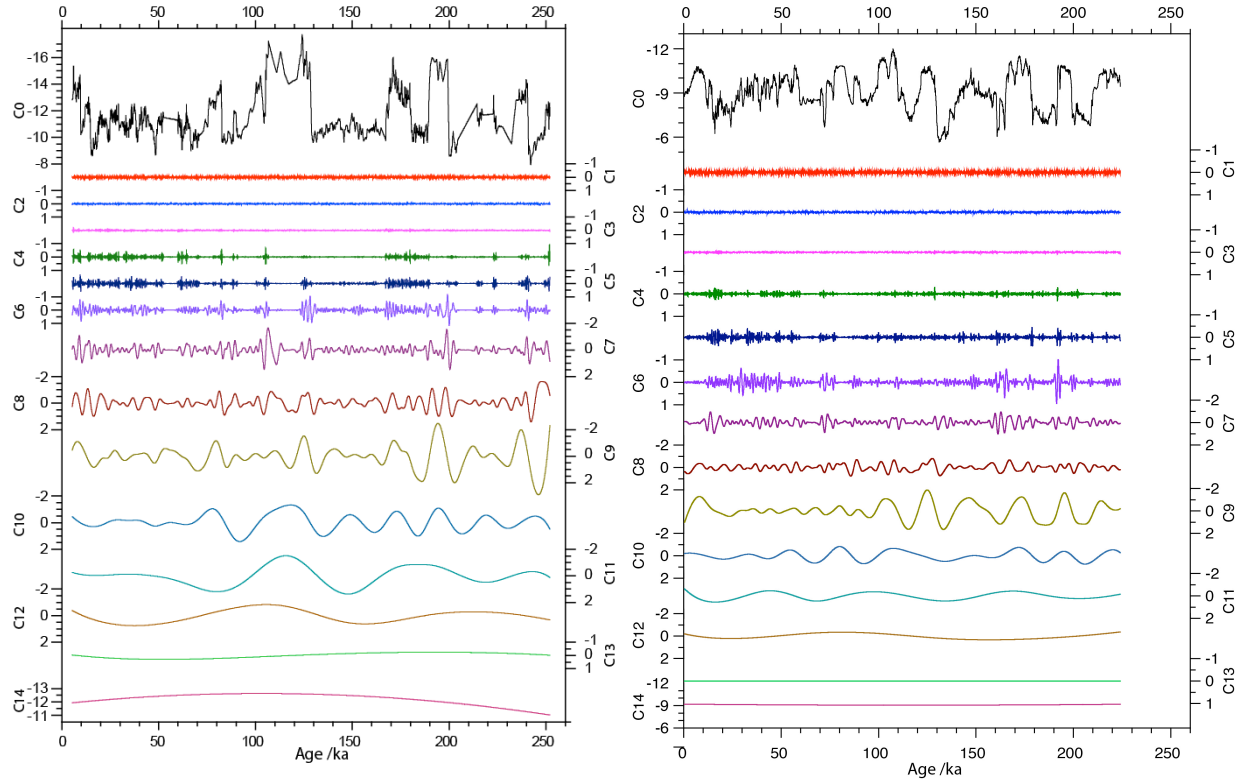

Figure S9. Intrinsic components of the ensemble empirical mode decomposition (EEMD) of the (a) XBL and (b) Hulu-Dongge-Sanbao composite  $\delta^{18}\text{O}_c$  records. We combined the different stalagmite records by interpolating each to 10 yr resolution and averaging to produce the XBL composite record. White noise of 0.4 (0.2 standard deviations of the data) and the ensemble number of 500 are used for the first EEMD decomposition. To remove high-frequency fluctuations, new time series were formed by summing components C5-14 from the first decomposition (C0 in the figure). EEMD analysis (24) was repeated for new time series with white noise of 0.4 and ensemble size of 300, producing the components shown above.

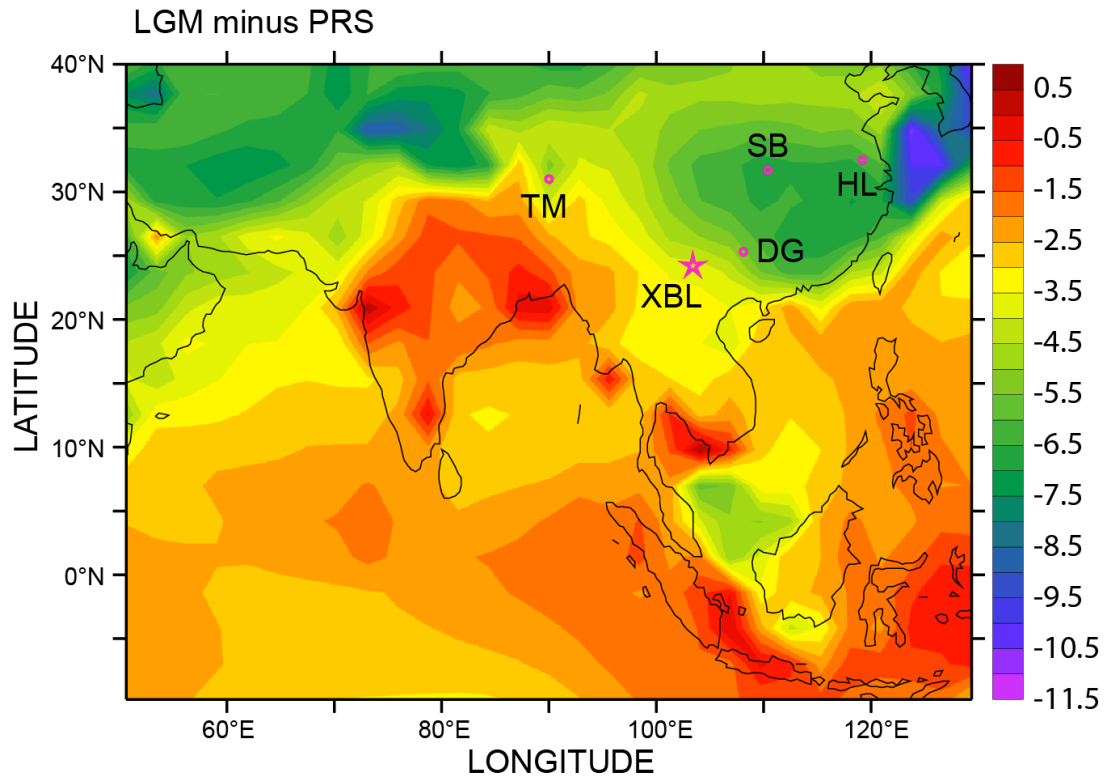

Figure S10. Modeled temperature difference between LGM and Present Day. It indicates that the temperature changes are  $\sim 4 \pm 0.5^\circ\text{C}$  at XBL cave,  $\sim 6 \pm 0.5^\circ\text{C}$  at Hulu and Sanbao caves. Here we use the  $4^\circ\text{C}$  and  $6^\circ\text{C}$  for XBL and HL-DG-SB caves respectively to calculate the speleothem calcite  $\delta^{18}\text{O}$  by using the temperature dependent fraction (25).

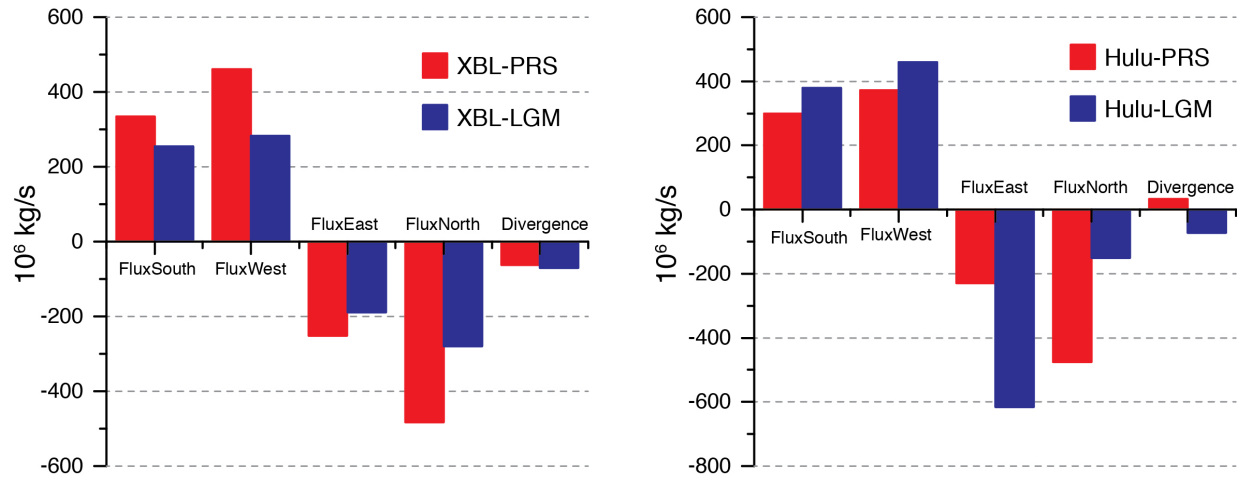

Figure S11. Vertically-integrated water vapor fluxes and divergence into and out of boxes around (a) XBL (100-110°E, 20-30°N) and (b) Hulu (115-125°E, 25-35°N). Present-day values are in red and LGM values are in blue. FluxSouth, FluxWest, FluxEast and FluxNorth denote integrated water vapor flux across the southern, western, eastern and northern boundaries of the boxes. Here positive values indicate fluxes into the boxes and negative values indicate fluxes out of the boxes. Unit is  $10^6 \text{ kg s}^{-1}$ .

## References

1. Dansgaard W (1964) Stable isotopes in precipitation. *Tellus* 16(4): 436-468.
2. Hu C, et al. (2008) Quantification of Holocene Asian monsoon rainfall from spatially separated cave records. *Earth and Planetary Science Letters* 266: 221-232.
3. Cai Y, et al. (2012) The Holocene Indian monsoon variability over the southern Tibetan Plateau and its teleconnections. *Earth and Planetary Science Letters* 335–336: 135-144.
4. Kudrass HR, Hofmann A, Doose H, Emeis K, Erlenkeuser H (2001) Modulation and amplification of climatic changes in the Northern Hemisphere by the Indian summer monsoon during the past 80 k.y. *Geology* 29: 63-66.
5. Collins W D, et al. (2002) Description of the NCAR Community Atmospheric Model (CAM2), 189 pp., National Center for Atmospheric Research, Boulder, Colo.
6. Lee J-E, Fung I, DePaolo DJ, Henning CC (2007) Analysis of the global distribution of water isotopes using the NCAR atmospheric general circulation model. *Journal of Geophysical Research: Atmospheres* 112: D16306.
7. Peltier WR (2004) Global glacial isostasy and the surface of the ice-age Earth: The ICE-5G (VM2) model and GRACE. *Annu Rev Earth Planet Sci* 32:111–149.
8. Otto-Bliesner B L, et al. (2006) Last Glacial Maximum and Holocene Climate in CCSM3. *Journal of Climate* 19(11): 2526-2544.
9. Pausata FSR, Battisti DS, Nisancioglu KH, Bitz CM (2011) Chinese stalagmite  $\delta^{18}\text{O}$  controlled by changes in the Indian monsoon during a simulated Heinrich event. *Nature Geoscience* 4: 474-480.
10. Boos WR, Kuang Z (2013) Sensitivity of the South Asian monsoon to elevated and non-elevated heating. *Scientific Reports* 3: 1192.
11. Lee, J-E, Fung I, DePaolo DJ, Otto-Bliesner B (2008) Water isotopes during the Last Glacial Maximum: New general circulation model calculations. *Journal of Geophysical Research: Atmospheres* 113: D19109.
12. Lee J-E, Johnson K, Fung I (2009) Precipitation over South America during the Last Glacial Maximum: An analysis of the “amount effect” with a water isotope-enabled general circulation model. *Geophysical Research Letters* 36: L19701.
13. Ding YH (2004) Seasonal march of East Asian monsoon. *East Asian monsoon*, ed Chang CP (World Scientific, Singapore), p 560.
14. Wang YJ, et al. (2001) A high-resolution absolute-dated late Pleistocene Monsoon record from Hulu cave, China. *Science* 294: 2345-2348.



15. Dykoski CA, et al. (2005) A high-resolution, absolute-dated Holocene and deglacial Asian monsoon record from Dongge Cave, China. *Earth and Planetary Science Letters* 233: 71-86.
16. Kelly MJ, et al. (2006) High resolution characterization of the Asian Monsoon between 146,000 and 99,000 years BP from Dongge Cave, China and global correlation of events surrounding Termination II. *Palaeogeography Palaeoclimatology Palaeoecology* 236: 20-38.
17. Wang, YJ, et al. (2008) Millennial- and orbital-scale changes in the East Asian monsoon over the past 224,000 years. *Nature* 451: 1090-1093.
18. Cheng H, et al. (2009) Ice Age Terminations. *Science* 326: 248-252.
19. Cai Y, et al. (2010) Large variations of oxygen isotopes in precipitation over south-central Tibet during Marine Isotope Stage 5. *Geology* 38: 243-246.
20. Sinha A, et al. (2005) Variability of Southwest Indian summer monsoon precipitation during the Bølling-Ållerød. *Geology* 33(10): 813-816.
21. Yatagai AO, et al. (2009) A 44-year daily gridded precipitation dataset for Asia based on a dense network of rain gauges, *SOLA*, 5: 137-140.
22. Braconnot P, et al. (2007) Results of PMIP2 coupled simulations of the Mid-Holocene and Last Glacial Maximum, Part 1: experiments and large-scale features. *Climate of the Past* 3: 261-277.
23. North Greenland Ice Core Project members (NGRIP members) (2004) High-resolution record of Northern Hemisphere climate extending into the last interglacial period. *Nature*, 431:147-151.
24. Wu Z, Huang NE (2009) Ensemble Empirical Mode Decomposition: A Noise-Assisted Data Analysis Method. *Advances in Adaptive Data Analysis* 01: 1-41.
25. Kim ST, O'Neil JR (1997) Equilibrium and nonequilibrium oxygen isotope effects in synthetic carbonates. *Geochim Cosmochim Acta* 61: 3461-3475.

Supplementary Table S1. <sup>230</sup>Th dating results. The error is 2σ error.

| Sample Number | Distance from bottom/mm | <sup>238</sup> U (ppb) | <sup>232</sup> Th (ppt) | <sup>230</sup> Th / <sup>232</sup> Th (atomic x10 <sup>-6</sup> ) | δ <sup>234</sup> U* (measured) | <sup>230</sup> Th / <sup>238</sup> U (activity) | <sup>230</sup> Th Age (ky) (uncorrected) | <sup>230</sup> Th Age (ky BP)*** (corrected) | δ <sup>234</sup> U <sub>Initial</sub> ** (corrected) |
|---------------|-------------------------|------------------------|-------------------------|-------------------------------------------------------------------|--------------------------------|-------------------------------------------------|------------------------------------------|----------------------------------------------|------------------------------------------------------|
| XBL3-8        | 8                       | 5170.8±7.1             | 1615±14                 | 17080±150                                                         | 34.9±1.5                       | 0.3232±0.0008                                   | 40.79±0.15                               | <b>40.73±0.15</b>                            | 39.2±1.6                                             |
| XBL3-20       | 20                      | 6110.7±35.2            | 425±7                   | 74910±1250                                                        | 36.0±2.4                       | 0.3156±0.0020                                   | 39.59±0.33                               | <b>39.54±0.33</b>                            | 40.2±2.7                                             |
| XBL3-34       | 34                      | 7791.5±44.2            | 1081±8                  | 36390±300                                                         | 37.6±2.3                       | 0.3058±0.0020                                   | 38.04±0.31                               | <b>37.98±0.31</b>                            | 41.8±2.6                                             |
| XBL3-38       | 38                      | 3116.8±5.3             | 521±10                  | 30310±560                                                         | 39.8±1.8                       | 0.3069±0.0009                                   | 38.11±0.16                               | <b>38.05±0.16</b>                            | 44.3±2.0                                             |
| XBL3-55       | 55                      | 138.0±0.2              | 1279±9                  | 525±5                                                             | 38.6±2.3                       | 0.2946±0.0017                                   | 36.35±0.27                               | <b>36.04±0.30</b>                            | 42.8±2.6                                             |
| XBL3-95       | 95                      | 190.2±0.2              | 47±8                    | 272280±63180                                                      | 43.3±1.2                       | 0.2892±0.0010                                   | 35.39±0.15                               | <b>35.33±0.15</b>                            | 47.8±1.3                                             |
| XBL3-133      | 133                     | 161.8±0.2              | 56±8                    | 42190±18900                                                       | 50.3±1.3                       | 0.2840±0.0011                                   | 34.36±0.16                               | <b>34.30±0.16</b>                            | 55.4±1.4                                             |
| XBL3-173      | 173                     | 170.9±0.2              | 210±7                   | 3720±130                                                          | 46.0±2.2                       | 0.2774±0.0015                                   | 33.57±0.23                               | <b>33.48±0.23</b>                            | 50.6±2.4                                             |
| XBL3-212      | 212                     | 141.0±0.2              | 256±8                   | 2500±80                                                           | 45.3±2.4                       | 0.2753±0.0017                                   | 33.30±0.25                               | <b>33.19±0.25</b>                            | 49.8±2.6                                             |
| XBL3-249      | 249                     | 115.4±0.2              | 156±6                   | 3240±130                                                          | 52.7±2.5                       | 0.2655±0.0019                                   | 31.66±0.28                               | <b>31.57±0.28</b>                            | 57.6±2.7                                             |
| XBL3-253      | 253                     | 156.5±0.2              | 35±10                   | 30850±13500                                                       | 52.2±1.4                       | 0.2659±0.0012                                   | 31.76±0.17                               | <b>31.70±0.17</b>                            | 57.1±1.6                                             |
| XBL3-280      | 280                     | 120.6±0.3              | 358±13                  | 1415±51                                                           | 45.2±3.6                       | 0.2546±0.0020                                   | 30.42±0.30                               | <b>30.28±0.30</b>                            | 49.2±4.0                                             |
| XBL7-15       | 15                      | 397.9±1.0              | 837±6                   | 3920±30                                                           | 43.5±2.2                       | 0.4993±0.0019                                   | 70.69±0.44                               | <b>70.58±0.44</b>                            | 53.1±2.7                                             |
| XBL7-37       | 37                      | 427.7±0.6              | 485±6                   | 7240±90                                                           | 44.7±1.5                       | 0.4967±0.0016                                   | 70.06±0.35                               | <b>69.97±0.35</b>                            | 54.5±1.8                                             |
| XBL7-64       | 64                      | 298.0±0.4              | 78±7                    | 30650±2570                                                        | 55.3±1.6                       | 0.4884±0.0018                                   | 67.41±0.38                               | <b>67.35±0.38</b>                            | 66.9±2.0                                             |
| XBL7-75       | 75                      | 310.1±0.4              | 341±7                   | 7270±140                                                          | 46.3±1.5                       | 0.4842±0.0021                                   | 67.47±0.42                               | <b>67.38±0.42</b>                            | 56.0±1.8                                             |
| XBL7-100      | 100                     | 297.8±0.8              | 357±6                   | 6460±110                                                          | 47.4±2.3                       | 0.4692±0.0020                                   | 64.53±0.43                               | <b>64.45±0.43</b>                            | 56.8±2.7                                             |
| XBL7-105      | 105                     | 299.5±0.7              | 296±6                   | 7780±160                                                          | 44.0±2.1                       | 0.4657±0.0020                                   | 64.18±0.41                               | <b>64.10±0.41</b>                            | 52.8±2.5                                             |
| XBL7-137      | 137                     | 256.3±0.3              | 94±5                    | 20280±1040                                                        | 40.6±1.5                       | 0.4501±0.0016                                   | 61.60±0.32                               | <b>61.54±0.32</b>                            | 48.3±1.8                                             |
| XBL7-186      | 186                     | 3793.4±13.0            | 122±6                   | 231030±11100                                                      | 50.7±1.6                       | 0.4516±0.0018                                   | 61.02±0.35                               | <b>60.96±0.35</b>                            | 60.3±1.9                                             |
| XBL7-215      | 215                     | 4328.6±30.6            | 190±6                   | 170620±5020                                                       | 53.8±2.9                       | 0.4533±0.0035                                   | 61.06±0.68                               | <b>61.00±0.68</b>                            | 64.0±3.4                                             |
| XBL7-244      | 244                     | 1886.7±13.1            | 121±5                   | 112710±4490                                                       | 35.9±3.0                       | 0.4368±0.0033                                   | 59.57±0.65                               | <b>59.51±0.65</b>                            | 42.5±3.5                                             |
| XBL65-4       | 4                       | 131.0±0.1              | 104±2                   | 17650±370                                                         | 57.8±1.3                       | 0.8466±0.0014                                   | 170.8±0.9                                | <b>170.8±0.9</b>                             | 93.7±2.2                                             |
| XBL65-66      | 66                      | 135.3±0.1              | 42±1                    | 44410±990                                                         | 54.5±1.4                       | 0.8418±0.0013                                   | 170.1±0.9                                | <b>170.0±0.9</b>                             | 88.1±2.2                                             |
| XBL65-104     | 104                     | 159.6±0.2              | 65±1                    | 34200±720                                                         | 55.0±1.4                       | 0.8422±0.0015                                   | 170.0±1.0                                | <b>170.0±1.0</b>                             | 88.9±2.3                                             |
| XBL65-147     | 147                     | 150.7±0.2              | 72±2                    | 28960±620                                                         | 58.9±1.4                       | 0.8435±0.0014                                   | 168.9±0.9                                | <b>168.8±0.9</b>                             | 94.9±2.3                                             |
| XBL65-215     | 215                     | 185.9±0.2              | 111±2                   | 23170±480                                                         | 58.8±1.4                       | 0.8429±0.0020                                   | 168.7±1.1                                | <b>168.6±1.1</b>                             | 94.6±2.3                                             |
| XBL65-244     | 244                     | 197.9±0.2              | 103±2                   | 26560±560                                                         | 51.6±1.3                       | 0.8344±0.0012                                   | 167.9±0.8                                | <b>167.8±0.8</b>                             | 82.8±2.2                                             |
| XBL27-5       | 5                       | 221.4±0.5              | 53±9                    | 59540±9710                                                        | 36.8±2.2                       | 0.8607±0.0035                                   | 189.4±2.4                                | <b>189.4±2.4</b>                             | 62.8±3.7                                             |
| XBL27-43      | 43                      | 231.2±0.3              | 238±5                   | 13740±280                                                         | 40.4±1.5                       | 0.8582±0.0014                                   | 185.7±1.1                                | <b>185.6±1.1</b>                             | 68.2±2.5                                             |
| XBL27-121     | 121                     | 214.8±0.2              | 200±4                   | 15250±310                                                         | 44.2±1.4                       | 0.8594±0.0014                                   | 184.2±1.1                                | <b>184.1±1.1</b>                             | 74.4±2.4                                             |
| XBL27-167     | 167                     | 111.1±0.1              | 108±2                   | 14520±300                                                         | 43.0±1.4                       | 0.8541±0.0014                                   | 182.0±1.1                                | <b>181.9±1.1</b>                             | 71.8±2.3                                             |
| XBL27-213     | 213                     | 80.6±0.2               | 22±8                    | 52470±20030                                                       | 48.0±2.9                       | 0.8528±0.0041                                   | 178.9±2.6                                | <b>178.9±2.6</b>                             | 79.6±4.8                                             |
| XBL27-267     | 267                     | 57.5±0.0               | 153±3                   | 5240±110                                                          | 40.9±1.4                       | 0.8428±0.0016                                   | 177.1±1.1                                | <b>177.0±1.1</b>                             | 67.5±2.3                                             |
| XBL27-302     | 302                     | 68.6±0.1               | 46±1                    | 20630±460                                                         | 40.6±1.4                       | 0.8422±0.0016                                   | 177.0±1.1                                | <b>176.9±1.1</b>                             | 66.9±2.3                                             |
| XBL27-357     | 357                     | 34.0±0.1               | 47±6                    | 9890±1260                                                         | 40.5±3.4                       | 0.8338±0.0049                                   | 172.9±2.9                                | <b>172.9±2.9</b>                             | 66.0±5.5                                             |
| XBL26-0.5     | 1                       | 99.8±0.2               | 867±3                   | 1780±10                                                           | 28.8±2.1                       | 0.9342±0.0033                                   | 252.6±4.3                                | <b>252.3±4.3</b>                             | 58.7±4.4                                             |
| XBL26-39      | 39                      | 116.1±0.2              | 276±3                   | 6430±80                                                           | 25.0±2.7                       | 0.9262±0.0036                                   | 248.8±4.8                                | <b>248.7±4.8</b>                             | 50.4±5.4                                             |
| XBL26-74      | 74                      | 95.7±0.2               | 61±3                    | 23900±1060                                                        | 24.9±2.6                       | 0.9184±0.0032                                   | 241.3±4.1                                | <b>241.2±4.1</b>                             | 49.2±5.2                                             |
| XBL26-82      | 82                      | 205.8±0.4              | 31±2                    | 101480±7830                                                       | 25.6±2.6                       | 0.9181±0.0031                                   | 240.2±4.0                                | <b>240.1±4.0</b>                             | 50.5±5.2                                             |
| XBL26-99      | 99                      | 3377.4±14.3            | 53±3                    | 973870±49520                                                      | 30.5±2.4                       | 0.9239±0.0046                                   | 240.5±5.0                                | <b>240.4±5.0</b>                             | 60.2±4.7                                             |
| XBL26-122     | 122                     | 107.2±0.3              | 83±6                    | 19570±1420                                                        | 22.9±2.6                       | 0.9170±0.0040                                   | 242.0±4.8                                | <b>241.9±4.8</b>                             | 45.4±5.2                                             |
| XBL26-123     | 123                     | 172.7±0.2              | 409±5                   | 6340±80                                                           | 25.1±1.9                       | 0.9092±0.0032                                   | 232.6±3.4                                | <b>232.4±3.4</b>                             | 48.5±3.6                                             |
| XBL26-125     | 125                     | 171.3±0.3              | 625±3                   | 4130±20                                                           | 24.8±2.9                       | 0.9123±0.0033                                   | 235.7±4.1                                | <b>235.5±4.1</b>                             | 48.3±5.6                                             |
| XBL26-135     | 135                     | 226.7±0.3              | 696±8                   | 4860±60                                                           | 28.8±1.9                       | 0.9036±0.0029                                   | 224.5±2.9                                | <b>224.3±2.9</b>                             | 54.3±3.6                                             |
| XBL26-168     | 168                     | 61.3±0.2               | 1488±7                  | 621±4                                                             | 32.8±3.3                       | 0.9133±0.0048                                   | 228.9±5.1                                | <b>228.1±5.0</b>                             | 62.5±6.4                                             |
| XBL26-170     | 170                     | 222.0±0.4              | 225±3                   | 14630±210                                                         | 26.7±2.6                       | 0.8989±0.0032                                   | 222.6±3.4                                | <b>222.5±3.4</b>                             | 50.1±5.0                                             |

Table S1. (Cont.)

| Sample Number | Distance from bottom/mm | <sup>238</sup> U (ppb) | <sup>232</sup> Th (ppt) | <sup>230</sup> Th / <sup>232</sup> Th (atomic x10 <sup>-6</sup> ) | δ <sup>234</sup> U* (measured) | <sup>230</sup> Th / <sup>238</sup> U (activity) | <sup>230</sup> Th Age (ky) (uncorrected) | <sup>230</sup> Th Age (ky BP)** (corrected) | δ <sup>234</sup> U <sub>initial</sub> ** (corrected) |
|---------------|-------------------------|------------------------|-------------------------|-------------------------------------------------------------------|--------------------------------|-------------------------------------------------|------------------------------------------|---------------------------------------------|------------------------------------------------------|
| XBL26-178     | 178                     | 157.0±0.2              | 639±6                   | 3630±40                                                           | 28.5±1.7                       | 0.8933±0.0029                                   | 216.6±2.6                                | <b>216.5±2.6</b>                            | 52.6±3.2                                             |
| XBL26-184     | 184                     | 152.8±0.3              | 1493±10                 | 1510±10                                                           | 28.9±2.1                       | 0.8945±0.0035                                   | 217.3±3.2                                | <b>217.0±3.2</b>                            | 53.3±4.0                                             |
| XBL26-189     | 189                     | 136.2±0.3              | 460±6                   | 4390±60                                                           | 37.0±2.4                       | 0.8997±0.0029                                   | 214.6±2.8                                | <b>214.5±2.8</b>                            | 67.9±4.4                                             |
| XBL26-197     | 197                     | 300.8±0.5              | 112±9                   | 39500±3080                                                        | 42.1±2.0                       | 0.8894±0.0026                                   | 203.8±2.2                                | <b>203.7±2.2</b>                            | 74.9±3.5                                             |
| XBL26-211     | 211                     | 244.9±0.3              | 19±7                    | 188380±67760                                                      | 39.3±1.6                       | 0.8836±0.0031                                   | 201.9±2.3                                | <b>201.9±2.3</b>                            | 69.6±2.9                                             |
| XBL26-251     | 251                     | 228.7±0.3              | 19±7                    | 171340±59670                                                      | 41.1±1.6                       | 0.8846±0.0029                                   | 201.3±2.1                                | <b>201.3±2.1</b>                            | 72.6±2.9                                             |
| XBL26-262     | 262                     | 97.9±0.1               | 50±10                   | 28690±5990                                                        | 39.2±1.8                       | 0.8819±0.0024                                   | 200.9±2.0                                | <b>200.8±2.0</b>                            | 69.2±3.1                                             |
| XBL26-294     | 294                     | 152.1±0.2              | 25±5                    | 85260±18330                                                       | 37.8±1.8                       | 0.8580±0.0028                                   | 187.3±1.9                                | <b>187.3±1.9</b>                            | 64.1±3.2                                             |
| XBL26-366     | 366                     | 193.0±0.3              | 73±7                    | 36580±3570                                                        | 29.8±2.1                       | 0.8419±0.0029                                   | 182.7±2.0                                | <b>182.6±2.0</b>                            | 50.0±3.5                                             |
| XBL26-402     | 402                     | 177.5±0.3              | 178±5                   | 13950±380                                                         | 38.3±2.1                       | 0.8456±0.0030                                   | 180.1±2.0                                | <b>180.0±2.0</b>                            | 63.7±3.6                                             |
| XBL26-414     | 414                     | 110.1±0.2              | 77±8                    | 19660±1960                                                        | 35.4±2.0                       | 0.8330±0.0024                                   | 175.0±1.6                                | <b>175.0±1.6</b>                            | 58.1±3.2                                             |
| XBL26-434     | 434                     | 66.5±0.2               | 32±6                    | 27860±5480                                                        | 37.8±4.5                       | 0.8249±0.0044                                   | 169.8±3.0                                | <b>169.7±3.0</b>                            | 61.1±7.3                                             |
| XBL26-466     | 466                     | 43.1±0.1               | 90±6                    | 6630±450                                                          | 39.0±3.8                       | 0.8357±0.0047                                   | 174.7±3.0                                | <b>174.6±3.0</b>                            | 63.8±6.2                                             |
| XBL26-469     | 469                     | 71.9±0.1               | 1935±11                 | 511±4                                                             | 41.2±1.7                       | 0.8320±0.0042                                   | 171.7±2.2                                | <b>170.9±2.2</b>                            | 66.9±2.8                                             |
| XBL26-474     | 474                     | 102.7±0.1              | 156±6                   | 8830±340                                                          | 40.9±2.5                       | 0.8099±0.0039                                   | 161.5±2.0                                | <b>161.4±2.0</b>                            | 64.5±4.0                                             |
| XBL26-504     | 504                     | 50.8±0.1               | 120±6                   | 5320±290                                                          | 43.5±3.8                       | 0.7621±0.0054                                   | 140.9±2.4                                | <b>140.8±2.4</b>                            | 64.8±5.7                                             |
| XBL26-524     | 524                     | 100.6±0.1              | 65±7                    | 17980±1900                                                        | 38.3±2.5                       | 0.7063±0.0047                                   | 123.2±1.6                                | <b>123.1±1.6</b>                            | 54.3±3.6                                             |
| XBL26-535     | 535                     | 96.2±0.1               | 286±6                   | 2940±70                                                           | 39.0±2.7                       | 0.5295±0.0050                                   | 77.4±1.1                                 | <b>77.2±1.1</b>                             | 48.5±3.3                                             |
| XBL48-13      | 13                      | 313.4±0.8              | 871±3                   | 4060±20                                                           | 85.2±3.4                       | 0.6840±0.0031                                   | 106.66±1.02                              | <b>106.54±1.02</b>                          | 115.1±4.7                                            |
| XBL48-34      | 34                      | 285.0±0.4              | 90±5                    | 35840±2090                                                        | 87.4±1.7                       | 0.6818±0.0020                                   | 105.69±0.59                              | <b>105.62±0.59</b>                          | 117.9±2.2                                            |
| XBL48-56      | 56                      | 389.9±0.8              | 30±3                    | 143870±13880                                                      | 87.8±3.0                       | 0.6773±0.0035                                   | 104.46±1.04                              | <b>104.40±1.04</b>                          | 118.0±4.0                                            |
| XBL48-67      | 67                      | 396.1±0.9              | 200±3                   | 21740±370                                                         | 78.0±3.0                       | 0.6643±0.0025                                   | 102.76±0.83                              | <b>102.69±0.83</b>                          | 104.3±4.0                                            |
| XBL48-73      | 73                      | 201.3±0.6              | 53±3                    | 41200±2250                                                        | 75.5±5.4                       | 0.6528±0.0037                                   | 100.43±1.30                              | <b>100.37±1.29</b>                          | 100.3±7.2                                            |
| XBL48-81      | 81                      | 217.9±0.5              | 245±4                   | 9150±150                                                          | 69.2±3.4                       | 0.6248±0.0029                                   | 94.52±0.86                               | <b>94.43±0.86</b>                           | 90.3±4.4                                             |
| XBL48-86      | 86                      | 294.4±0.6              | 227±4                   | 12850±210                                                         | 57.2±3.1                       | 0.6011±0.0026                                   | 90.75±0.76                               | <b>90.67±0.76</b>                           | 73.8±4.0                                             |
| XBL48-102     | 102                     | 358.1±0.8              | 90±2                    | 39450±1010                                                        | 63.5±2.9                       | 0.6032±0.0027                                   | 90.44±0.76                               | <b>90.37±0.76</b>                           | 82.0±3.7                                             |
| XBL48-108     | 108                     | 283.2±0.5              | 110±3                   | 25530±600                                                         | 70.4±2.7                       | 0.6023±0.0027                                   | 89.24±0.72                               | <b>89.17±0.72</b>                           | 90.6±3.4                                             |
| XBL48-126     | 126                     | 267.3±0.6              | 372±3                   | 7070±60                                                           | 66.6±3.0                       | 0.5971±0.0025                                   | 88.47±0.71                               | <b>88.37±0.71</b>                           | 85.5±3.9                                             |
| XBL48-165     | 165                     | 229.2±0.5              | 216±3                   | 9910±150                                                          | 60.9±3.1                       | 0.5673±0.0028                                   | 82.65±0.72                               | <b>82.57±0.72</b>                           | 76.9±3.9                                             |
| XBL48-200     | 200                     | 216.1±0.3              | 87±4                    | 22230±1030                                                        | 64.1±1.6                       | 0.5418±0.0018                                   | 77.00±0.41                               | <b>76.93±0.41</b>                           | 79.7±2.0                                             |
| XBL4-1        | 1                       | 293.0±0.4              | 566±7                   | 4970±70                                                           | 90.5±2.2                       | 0.5814±0.0029                                   | 82.06±0.66                               | <b>81.95±0.66</b>                           | 114.2±2.7                                            |
| XBL4-80       | 80                      | 264.3±0.3              | 109±6                   | 22600±1170                                                        | 80.6±1.4                       | 0.5667±0.0021                                   | 80.22±0.46                               | <b>80.15±0.46</b>                           | 101.1±1.8                                            |
| XBL4-150      | 150                     | 299.1±0.4              | 526±9                   | 5360±100                                                          | 75.1±2.3                       | 0.5713±0.0024                                   | 81.84±0.58                               | <b>81.74±0.58</b>                           | 94.6±3.0                                             |
| XBL4-203      | 203                     | 295.9±0.4              | 71±6                    | 38990±3290                                                        | 79.4±1.6                       | 0.5645±0.0020                                   | 79.90±0.46                               | <b>79.84±0.46</b>                           | 99.5±2.0                                             |
| XBL4-237      | 237                     | 780.0±0.8              | 816±12                  | 9120±140                                                          | 120.7±1.9                      | 0.5776±0.0022                                   | 77.82±0.47                               | <b>77.74±0.47</b>                           | 150.4±2.4                                            |
| XBL4-263      | 263                     | 266.2±0.4              | 1112±6                  | 2062±14                                                           | 57.1±1.6                       | 0.5217±0.0020                                   | 73.71±0.43                               | <b>73.54±0.43</b>                           | 70.3±2.0                                             |
| XBL4-270      | 270                     | 475.9±0.7              | 810±5                   | 5011±37                                                           | 81.0±1.4                       | 0.5169±0.0018                                   | 70.31±0.36                               | <b>70.21±0.36</b>                           | 98.8±1.7                                             |
| XBL4-272      | 272                     | 209.5±0.3              | 2429±23                 | 651±7                                                             | 65.3±3.8                       | 0.4572±0.0027                                   | 60.81±0.57                               | <b>60.44±0.59</b>                           | 77.5±4.5                                             |
| XBL4-275      | 275                     | 162.7±0.2              | 133±5                   | 9050±330                                                          | 73.4±2.2                       | 0.4476±0.0020                                   | 58.50±0.38                               | <b>58.42±0.38</b>                           | 86.6±2.6                                             |
| XBL29-39      | 39                      | 63.7±0.1               | 447±7                   | 803±14                                                            | 41.0±3.3                       | 0.3410±0.0033                                   | 43.21±0.54                               | <b>42.96±0.55</b>                           | 46.3±3.8                                             |
| XBL29-69      | 69                      | 57.6±0.1               | 217±4                   | 1351±28                                                           | 38.3±2.3                       | 0.3082±0.0009                                   | 38.31±0.17                               | <b>38.14±0.18</b>                           | 42.7±2.6                                             |
| XBL29-95      | 95                      | 13.8±0.0               | 82±6                    | 844±63                                                            | 40.9±4.6                       | 0.3031±0.0034                                   | 37.49±0.54                               | <b>37.27±0.55</b>                           | 45.5±5.1                                             |
| XBL29-112     | 112                     | 34.3±0.0               | 45±1                    | 3812±93                                                           | 46.8±1.5                       | 0.3045±0.0010                                   | 37.39±0.16                               | <b>37.29±0.16</b>                           | 52.0±1.6                                             |
| XBL29-168     | 168                     | 35.5±0.1               | 447±9                   | 348±8                                                             | 44.6±3.1                       | 0.2662±0.0034                                   | 32.00±0.48                               | <b>31.59±0.54</b>                           | 48.7±3.4                                             |
| XBL29-173     | 173                     | 39.0±0.0               | 65±1                    | 2429±53                                                           | 44.6±1.4                       | 0.2467±0.0009                                   | 29.32±0.13                               | <b>29.22±0.14</b>                           | 48.4±1.5                                             |
| XBL29-195     | 195                     | 47.1±0.0               | 66±1                    | 2771±62                                                           | 37.5±1.7                       | 0.2366±0.0010                                   | 28.17±0.15                               | <b>28.08±0.15</b>                           | 40.6±1.8                                             |
| XBL29-216     | 216                     | 21.9±0.1               | 118±6                   | 689±36                                                            | 42.9±3.5                       | 0.2258±0.0024                                   | 26.60±0.34                               | <b>26.39±0.34</b>                           | 46.3±3.7                                             |
| XBL29-275     | 275                     | 58.9±0.1               | 82±3                    | 2442±93                                                           | 40.4±4.5                       | 0.2068±0.0025                                   | 24.16±0.34                               | <b>24.06±0.34</b>                           | 43.2±4.9                                             |
| XBL29-338     | 338                     | 9.3±0.0                | 21±6                    | 1448±419                                                          | 50.2±4.5                       | 0.1958±0.0032                                   | 22.50±0.42                               | <b>22.38±0.42</b>                           | 53.4±4.8                                             |

Table S1. (Cont.)

| Sample Number | Distance from bottom/mm | <sup>238</sup> U (ppb) | <sup>232</sup> Th (ppt) | <sup>230</sup> Th / <sup>232</sup> Th (atomic x10 <sup>-6</sup> ) | $\delta^{234}\text{U}^*$ (measured) | <sup>230</sup> Th / <sup>238</sup> U (activity) | <sup>230</sup> Th Age (ky) (uncorrected) | <sup>230</sup> Th Age (ky BP) <sup>***</sup> (corrected) | $\delta^{234}\text{U}_{\text{initial}}^{**}$ (corrected) |
|---------------|-------------------------|------------------------|-------------------------|-------------------------------------------------------------------|-------------------------------------|-------------------------------------------------|------------------------------------------|----------------------------------------------------------|----------------------------------------------------------|
| XBL29-403     | 403                     | 59.0±0.1               | 594±3                   | 311±4                                                             | 39.8±3.9                            | 0.1899±0.0022                                   | 21.99±0.30                               | <b>21.65±0.33</b>                                        | 42.3±4.2                                                 |
| XBL29-463     | 463                     | 93.8±0.2               | 2990±9                  | 100±1                                                             | 51.9±2.6                            | 0.1921±0.0016                                   | 21.99±0.21                               | <b>21.05±0.49</b>                                        | 55.1±2.8                                                 |
| XBL29-473     | 473                     | 72.2±0.1               | 6699±40                 | 37±1                                                              | 43.3±2.5                            | 0.2051±0.0042                                   | 23.86±0.55                               | <b>21.20±1.43</b>                                        | 46.0±2.6                                                 |
| XBL29-555     | 555                     | 15.1±0.0               | 296±6                   | 120±3                                                             | 34.6±4.4                            | 0.1429±0.0026                                   | 16.22±0.33                               | <b>15.61±0.43</b>                                        | 36.1±4.6                                                 |
| XBL29-561     | 561                     | 58.6±0.2               | 1290±6                  | 89±2                                                              | 31.0±4.7                            | 0.1190±0.0028                                   | 13.38±0.35                               | <b>12.70±0.46</b>                                        | 32.1±4.9                                                 |
| XBL29-564     | 564                     | 26.1±0.1               | 1424±5                  | 30±1                                                              | 41.5±5.6                            | 0.1005±0.0040                                   | 11.08±0.46                               | <b>9.48±0.90</b>                                         | 42.7±5.7                                                 |
| XBL29-588     | 588                     | 153.2±0.4              | 1679±5                  | 112±2                                                             | 45.2±3.1                            | 0.0746±0.0010                                   | 8.08±0.12                                | <b>7.72±0.19</b>                                         | 46.2±3.2                                                 |
| XBL29-595     | 595                     | 162.3±0.3              | 1882±7                  | 85±1                                                              | 43.7±2.0                            | 0.0600±0.0006                                   | 6.46±0.07                                | <b>6.08±0.17</b>                                         | 44.5±2.0                                                 |

\* $\delta^{234}\text{U} = ([^{234}\text{U}/^{238}\text{U}]_{\text{activity}} - 1) \times 1000$ . \*\*  $\delta^{234}\text{U}_{\text{initial}}$  was calculated based on <sup>230</sup>Th age (T), i.e.,  $\delta^{234}\text{U}_{\text{initial}} = \delta^{234}\text{U}_{\text{measured}} \times e^{\lambda_{234} \times T}$ . Corrected <sup>230</sup>Th ages assume the initial <sup>230</sup>Th/<sup>232</sup>Th atomic ratio of  $4.4 \pm 2.2 \times 10^{-6}$ . Those are the values for a material at secular equilibrium, with the bulk earth <sup>232</sup>Th/<sup>238</sup>U value of 3.8. The errors are arbitrarily assumed to be 50%. \*\*\*B.P. stands for “Before Present” where the “Present” is defined as the year 1950 A.D.

Supplementary Table S2. Oxygen isotopic data of stalagmites from Xiaobailong Cave. Depths are relative to the bottom (oldest end) of the stalagmites and are measured along the growth axis. Ages are linearly interpolated between  $^{230}\text{Th}$  dates (see Table S1).

| Distance (mm) | Age (ky, BP) | $\delta^{18}\text{O}$ (‰, VPDB) | Distance (mm) | Age (ky, BP) | $\delta^{18}\text{O}$ (‰, VPDB) | Distance (mm) | Age (ky, BP) | $\delta^{18}\text{O}$ (‰, VPDB) | Distance (mm) | Age (ky, BP) | $\delta^{18}\text{O}$ (‰, VPDB) |
|---------------|--------------|---------------------------------|---------------|--------------|---------------------------------|---------------|--------------|---------------------------------|---------------|--------------|---------------------------------|
| <b>XBL-29</b> |              |                                 |               |              |                                 |               |              |                                 |               |              |                                 |
| 598.18        | 5.34         | -12.79                          | 585.35        | 7.92         | -13.54                          | 568.32        | 9.20         | -13.03                          | 559.80        | 13.46        | -11.83                          |
| 597.30        | 5.54         | -12.89                          | 585.00        | 7.94         | -13.42                          | 567.95        | 9.22         | -14.30                          | 559.60        | 13.55        | -12.41                          |
| 596.85        | 5.65         | -13.01                          | 584.55        | 7.98         | -15.08                          | 567.58        | 9.25         | -13.89                          | 559.40        | 13.64        | -12.44                          |
| 596.41        | 5.75         | -13.45                          | 584.11        | 8.01         | -12.85                          | 567.20        | 9.28         | -14.08                          | 559.19        | 13.73        | -13.33                          |
| 595.97        | 5.85         | -13.61                          | 583.66        | 8.04         | -13.09                          | 566.83        | 9.31         | -14.50                          | 558.99        | 13.82        | -12.26                          |
| 595.75        | 5.91         | -13.14                          | 583.21        | 8.08         | -13.37                          | 566.46        | 9.34         | -14.25                          | 558.79        | 13.91        | -11.46                          |
| 595.66        | 5.93         | -12.75                          | 582.77        | 8.11         | -14.34                          | 566.08        | 9.36         | -14.89                          | 558.59        | 14.00        | -12.28                          |
| 595.53        | 5.96         | -16.22                          | 582.32        | 8.15         | -13.64                          | 565.71        | 9.39         | -14.57                          | 558.39        | 14.09        | -12.35                          |
| 595.44        | 5.98         | -17.08                          | 581.88        | 8.18         | -12.91                          | 565.34        | 9.42         | -14.56                          | 558.19        | 14.18        | -12.26                          |
| 595.31        | 6.01         | -15.64                          | 581.43        | 8.21         | -13.28                          | 564.96        | 9.45         | -15.24                          | 557.98        | 14.27        | -12.74                          |
| 595.22        | 6.03         | -15.37                          | 580.98        | 8.25         | -13.70                          | 564.88        | 9.46         | -14.83                          | 557.78        | 14.36        | -11.92                          |
| 595.09        | 6.06         | -13.82                          | 580.54        | 8.28         | -13.81                          | 564.75        | 9.46         | -14.67                          | 557.58        | 14.45        | -11.11                          |
| 595.00        | 6.08         | -13.36                          | 580.09        | 8.31         | -13.70                          | 564.67        | 9.47         | -13.90                          | 557.38        | 14.54        | -11.31                          |
| 594.89        | 6.11         | -13.24                          | 579.67        | 8.34         | -13.58                          | 564.55        | 9.48         | -13.47                          | 557.18        | 14.64        | -11.47                          |
| 594.81        | 6.12         | -13.64                          | 579.26        | 8.37         | -15.00                          | 564.46        | 9.52         | -13.57                          | 556.98        | 14.73        | -10.83                          |
| 594.70        | 6.15         | -13.65                          | 578.85        | 8.41         | -14.54                          | 564.34        | 9.66         | -10.46                          | 556.77        | 14.82        | -9.55                           |
| 594.33        | 6.24         | -14.01                          | 578.44        | 8.44         | -12.65                          | 564.26        | 9.75         | -10.17                          | 556.57        | 14.91        | -9.33                           |
| 593.96        | 6.32         | -13.35                          | 578.03        | 8.47         | -14.00                          | 564.13        | 9.88         | -10.25                          | 556.37        | 15.00        | -9.17                           |
| 593.59        | 6.41         | -14.36                          | 577.62        | 8.50         | -14.40                          | 564.05        | 9.97         | -10.38                          | 555.97        | 15.18        | -8.60                           |
| 593.22        | 6.50         | -13.50                          | 577.21        | 8.53         | -13.78                          | 563.93        | 10.10        | -10.39                          | 555.16        | 15.54        | -9.12                           |
| 592.85        | 6.58         | -13.68                          | 576.80        | 8.56         | -12.66                          | 563.84        | 10.19        | -10.47                          | 554.30        | 15.65        | -8.50                           |
| 592.48        | 6.67         | -13.48                          | 576.39        | 8.59         | -11.98                          | 563.72        | 10.32        | -10.30                          | 553.44        | 15.71        | -8.57                           |
| 592.11        | 6.76         | -13.64                          | 575.98        | 8.62         | -13.02                          | 563.64        | 10.41        | -10.59                          | 552.57        | 15.76        | -9.03                           |
| 591.74        | 6.84         | -14.29                          | 575.57        | 8.65         | -13.89                          | 563.51        | 10.54        | -10.43                          | 551.70        | 15.82        | -8.82                           |
| 591.37        | 6.93         | -13.89                          | 575.16        | 8.68         | -13.13                          | 563.31        | 10.76        | -11.10                          | 550.83        | 15.87        | -8.70                           |
| 591.00        | 7.02         | -13.53                          | 574.75        | 8.71         | -14.17                          | 563.10        | 10.99        | -11.42                          | 549.96        | 15.93        | -8.65                           |
| 590.63        | 7.10         | -13.00                          | 574.34        | 8.74         | -14.73                          | 562.89        | 11.21        | -10.74                          | 549.05        | 15.98        | -8.59                           |
| 590.26        | 7.19         | -12.77                          | 573.93        | 8.78         | -13.56                          | 562.69        | 11.43        | -10.75                          | 548.15        | 16.04        | -9.38                           |
| 589.90        | 7.28         | -13.34                          | 573.51        | 8.81         | -13.46                          | 562.48        | 11.65        | -11.26                          | 547.25        | 16.10        | -9.68                           |
| 589.55        | 7.36         | -12.21                          | 573.10        | 8.84         | -14.07                          | 562.27        | 11.87        | -11.53                          | 546.35        | 16.16        | -9.91                           |
| 589.20        | 7.44         | -13.29                          | 572.69        | 8.87         | -13.03                          | 562.07        | 12.10        | -12.45                          | 545.45        | 16.21        | -9.89                           |
| 588.85        | 7.52         | -12.79                          | 572.27        | 8.90         | -14.81                          | 561.86        | 12.32        | -12.47                          | 544.59        | 16.27        | -10.01                          |
| 588.50        | 7.60         | -13.50                          | 571.86        | 8.93         | -15.01                          | 561.65        | 12.54        | -12.36                          | 543.77        | 16.32        | -9.52                           |
| 588.15        | 7.68         | -12.84                          | 571.45        | 8.96         | -14.63                          | 561.45        | 12.73        | -12.29                          | 542.95        | 16.37        | -9.45                           |
| 587.80        | 7.73         | -13.23                          | 571.03        | 8.99         | -13.50                          | 561.24        | 12.82        | -12.14                          | 542.13        | 16.42        | -9.54                           |
| 587.45        | 7.76         | -13.21                          | 570.62        | 9.02         | -15.00                          | 561.03        | 12.91        | -12.40                          | 541.31        | 16.47        | -9.27                           |
| 587.10        | 7.79         | -14.22                          | 570.21        | 9.05         | -13.70                          | 560.83        | 13.00        | -12.59                          | 540.49        | 16.53        | -9.23                           |
| 586.75        | 7.81         | -13.07                          | 569.81        | 9.08         | -13.38                          | 560.62        | 13.10        | -12.25                          | 539.66        | 16.58        | -9.14                           |
| 586.40        | 7.84         | -14.55                          | 569.44        | 9.11         | -13.89                          | 560.41        | 13.19        | -12.87                          | 538.82        | 16.63        | -9.24                           |
| 586.05        | 7.87         | -13.34                          | 569.07        | 9.14         | -14.08                          | 560.21        | 13.28        | -12.26                          | 537.98        | 16.69        | -9.33                           |
| 585.70        | 7.89         | -13.32                          | 568.69        | 9.17         | -13.60                          | 560.00        | 13.37        | -11.74                          | 537.14        | 16.74        | -9.23                           |

Continue to next page

Supplementary Table S2 (Cont.)

| Distance<br>(mm) | Age<br>(ky, BP) | $\delta^{18}\text{O}$<br>(‰,VPDB) |
|------------------|-----------------|-----------------------------------|------------------|-----------------|-----------------------------------|------------------|-----------------|-----------------------------------|------------------|-----------------|-----------------------------------|
| 536.30           | 16.79           | -9.17                             | 504              | 18.84           | -9.95                             | 457              | 21.11           | -11.29                            | 410              | 21.58           | -10.32                            |
| 535.46           | 16.84           | -8.99                             | 503              | 18.90           | -10.23                            | 456              | 21.12           | -11.41                            | 409              | 21.59           | -10.87                            |
| 534.61           | 16.90           | -9.50                             | 502              | 18.96           | -10.67                            | 455              | 21.13           | -11.13                            | 408              | 21.60           | -9.87                             |
| 533.73           | 16.95           | -9.69                             | 501              | 19.03           | -10.27                            | 454              | 21.14           | -10.93                            | 407              | 21.61           | -11.65                            |
| 532.85           | 17.01           | -9.62                             | 500              | 19.09           | -10.71                            | 453              | 21.15           | -11.30                            | 406              | 21.62           | -11.25                            |
| 531.97           | 17.07           | -9.72                             | 499              | 19.15           | -10.91                            | 452              | 21.16           | -11.11                            | 405              | 21.63           | -10.80                            |
| 531.10           | 17.12           | -9.49                             | 498              | 19.22           | -12.25                            | 451              | 21.17           | -11.19                            | 404              | 21.64           | -10.59                            |
| 530.22           | 17.18           | -9.37                             | 497              | 19.28           | -10.52                            | 450              | 21.18           | -10.74                            | 403              | 21.65           | -11.24                            |
| 529.43           | 17.23           | -9.65                             | 496              | 19.34           | -11.24                            | 449              | 21.19           | -11.53                            | 402              | 21.67           | -9.28                             |
| 528.67           | 17.27           | -10.32                            | 495              | 19.41           | -11.08                            | 448              | 21.20           | -11.31                            | 401              | 21.68           | -10.93                            |
| 527.92           | 17.32           | -10.81                            | 494              | 19.47           | -11.06                            | 447              | 21.21           | -11.92                            | 400              | 21.69           | -11.61                            |
| 527.16           | 17.37           | -9.90                             | 493              | 19.53           | -10.65                            | 446              | 21.22           | -10.75                            | 399              | 21.70           | -11.48                            |
| 526.40           | 17.42           | -9.41                             | 492              | 19.60           | -11.92                            | 445              | 21.23           | -11.81                            | 398              | 21.71           | -10.46                            |
| 525.64           | 17.47           | -9.96                             | 491              | 19.66           | -11.30                            | 444              | 21.24           | -11.20                            | 397              | 21.72           | -11.76                            |
| 524.86           | 17.52           | -10.53                            | 490              | 19.72           | -11.07                            | 443              | 21.25           | -11.96                            | 396              | 21.73           | -10.85                            |
| 523.91           | 17.58           | -8.49                             | 489              | 19.79           | -12.05                            | 442              | 21.26           | -11.29                            | 395              | 21.74           | -10.70                            |
| 522.95           | 17.64           | -10.11                            | 488              | 19.85           | -12.03                            | 441              | 21.27           | -11.56                            | 394              | 21.75           | -10.02                            |
| 522.00           | 17.70           | -9.73                             | 487              | 19.91           | -11.80                            | 440              | 21.28           | -11.09                            | 393              | 21.77           | -11.38                            |
| 521.05           | 17.76           | -8.30                             | 486              | 19.97           | -10.99                            | 439              | 21.29           | -10.68                            | 392              | 21.78           | -10.54                            |
| 520.10           | 17.82           | -9.69                             | 485              | 20.04           | -11.79                            | 438              | 21.30           | -11.44                            | 391              | 21.79           | -10.56                            |
| 519.18           | 17.88           | -9.04                             | 484              | 20.10           | -11.90                            | 437              | 21.31           | -12.55                            | 390              | 21.80           | -10.42                            |
| 518.27           | 17.93           | -8.80                             | 483              | 20.16           | -11.26                            | 436              | 21.32           | -11.43                            | 389              | 21.81           | -11.53                            |
| 517.82           | 17.96           | -9.30                             | 482              | 20.23           | -11.05                            | 435              | 21.33           | -10.91                            | 388              | 21.82           | -10.75                            |
| 517.36           | 17.99           | -10.18                            | 481              | 20.29           | -10.84                            | 434              | 21.34           | -10.81                            | 387              | 21.83           | -11.52                            |
| 516.91           | 18.02           | -8.23                             | 480              | 20.35           | -11.70                            | 433              | 21.35           | -10.18                            | 386              | 21.84           | -11.09                            |
| 516.46           | 18.05           | -9.48                             | 479              | 20.42           | -10.81                            | 432              | 21.36           | -11.44                            | 385              | 21.86           | -11.12                            |
| 515.55           | 18.11           | -9.78                             | 478              | 20.48           | -11.09                            | 431              | 21.37           | -10.44                            | 384              | 21.87           | -12.19                            |
| 514.53           | 18.17           | -8.83                             | 477              | 20.54           | -10.67                            | 430              | 21.38           | -11.94                            | 383              | 21.88           | -10.50                            |
| 513.35           | 18.24           | -9.81                             | 476              | 20.61           | -10.79                            | 429              | 21.39           | -11.77                            | 382              | 21.89           | -10.61                            |
| 513.00           | 18.27           | -10.00                            | 475              | 20.67           | -11.08                            | 428              | 21.40           | -11.64                            | 381              | 21.90           | -11.51                            |
| 512.18           | 18.32           | -9.57                             | 474              | 20.73           | -12.12                            | 427              | 21.41           | -11.07                            | 380              | 21.91           | -11.26                            |
| 512.00           | 18.33           | -9.40                             | 473              | 20.80           | -11.64                            | 426              | 21.42           | -11.59                            | 379              | 21.92           | -11.51                            |
| 511.50           | 18.39           | -10.21                            | 472              | 20.82           | -10.63                            | 425              | 21.43           | -10.12                            | 378              | 21.93           | -11.11                            |
| 510.80           | 18.39           | -10.78                            | 471              | 20.85           | -10.32                            | 424              | 21.44           | -10.99                            | 377              | 21.95           | -11.65                            |
| 510.00           | 18.46           | -10.50                            | 470              | 20.87           | -11.43                            | 423              | 21.45           | -10.48                            | 376              | 21.96           | -10.99                            |
| 509.86           | 18.46           | -10.68                            | 469              | 20.90           | -11.08                            | 422              | 21.46           | -10.90                            | 375              | 21.97           | -11.81                            |
| 509.00           | 18.52           | -10.73                            | 468              | 20.92           | -11.04                            | 421              | 21.47           | -10.61                            | 374              | 21.98           | -11.19                            |
| 508.94           | 18.52           | -10.13                            | 467              | 20.95           | -11.08                            | 420              | 21.48           | -10.89                            | 373              | 21.99           | -11.53                            |
| 508.01           | 18.58           | -10.81                            | 466              | 20.97           | -11.31                            | 419              | 21.49           | -10.55                            | 372              | 22.00           | -11.61                            |
| 508.00           | 18.58           | -10.75                            | 465              | 21.00           | -10.71                            | 418              | 21.50           | -12.50                            | 371              | 22.01           | -11.26                            |
| 507.08           | 18.64           | -11.31                            | 464              | 21.02           | -11.63                            | 417              | 21.51           | -10.86                            | 370              | 22.02           | -12.11                            |
| 507.00           | 18.65           | -11.73                            | 463              | 21.05           | -10.99                            | 416              | 21.52           | -10.87                            | 369              | 22.04           | -11.08                            |
| 506.16           | 18.70           | -10.99                            | 462              | 21.06           | -11.16                            | 415              | 21.53           | -10.77                            | 368              | 22.05           | -11.66                            |
| 506.00           | 18.71           | -10.56                            | 461              | 21.07           | -10.74                            | 414              | 21.54           | -10.94                            | 367              | 22.06           | -10.72                            |
| 505.23           | 18.76           | -11.12                            | 460              | 21.08           | -11.22                            | 413              | 21.55           | -11.86                            | 366              | 22.07           | -10.37                            |
| 504.79           | 18.77           | -11.42                            | 459              | 21.09           | -11.30                            | 412              | 21.56           | -10.66                            | 365              | 22.08           | -10.73                            |
| 504.38           | 18.77           | -11.40                            | 458              | 21.10           | -11.10                            | 411              | 21.57           | -10.86                            | 364              | 22.09           | -10.75                            |

Continue to next page

Supplementary Table S2 (Cont.)

| Distance<br>(mm) | Age<br>(ky, BP) | $\delta^{18}\text{O}$<br>(‰,VPDB) |
|------------------|-----------------|-----------------------------------|------------------|-----------------|-----------------------------------|------------------|-----------------|-----------------------------------|------------------|-----------------|-----------------------------------|
| 363              | 22.10           | -10.50                            | 316              | 22.97           | -11.59                            | 269              | 24.32           | -10.18                            | 222              | 26.15           | -11.55                            |
| 362              | 22.11           | -11.51                            | 315              | 23.00           | -10.66                            | 268              | 24.36           | -10.41                            | 221              | 26.19           | -11.01                            |
| 361              | 22.12           | -11.49                            | 314              | 23.03           | -11.05                            | 267              | 24.40           | -10.45                            | 220              | 26.23           | -11.01                            |
| 360              | 22.14           | -11.33                            | 313              | 23.05           | -10.73                            | 266              | 24.43           | -9.04                             | 219              | 26.27           | -11.31                            |
| 359              | 22.15           | -11.96                            | 312              | 23.08           | -10.96                            | 265              | 24.47           | -10.07                            | 218              | 26.31           | -11.07                            |
| 358              | 22.16           | -10.60                            | 311              | 23.11           | -11.02                            | 264              | 24.51           | -10.18                            | 217              | 26.35           | -11.43                            |
| 357              | 22.17           | -10.86                            | 310              | 23.14           | -11.37                            | 263              | 24.55           | -10.23                            | 216              | 26.39           | -12.13                            |
| 356              | 22.18           | -10.50                            | 309              | 23.16           | -10.58                            | 262              | 24.59           | -9.70                             | 215              | 26.47           | -11.22                            |
| 355              | 22.19           | -10.88                            | 308              | 23.19           | -11.23                            | 261              | 24.63           | -9.62                             | 214              | 26.55           | -11.68                            |
| 354              | 22.20           | -11.14                            | 307              | 23.22           | -10.61                            | 260              | 24.67           | -10.03                            | 213              | 26.64           | -11.80                            |
| 353              | 22.21           | -11.13                            | 306              | 23.24           | -10.66                            | 259              | 24.71           | -10.05                            | 212              | 26.72           | -11.85                            |
| 352              | 22.23           | -12.16                            | 305              | 23.27           | -11.28                            | 258              | 24.75           | -10.05                            | 211              | 26.80           | -11.38                            |
| 351              | 22.24           | -11.57                            | 304              | 23.30           | -10.91                            | 257              | 24.79           | -11.55                            | 210              | 26.88           | -11.62                            |
| 350              | 22.25           | -10.13                            | 303              | 23.32           | -10.80                            | 256              | 24.83           | -11.10                            | 209              | 26.97           | -11.99                            |
| 349              | 22.26           | -11.04                            | 302              | 23.35           | -10.61                            | 255              | 24.86           | -11.50                            | 208              | 27.05           | -11.82                            |
| 348              | 22.27           | -10.26                            | 301              | 23.38           | -10.60                            | 254              | 24.90           | -11.70                            | 207              | 27.13           | -10.84                            |
| 347              | 22.28           | -11.14                            | 300              | 23.40           | -10.90                            | 253              | 24.94           | -11.25                            | 206              | 27.21           | -11.61                            |
| 346              | 22.29           | -10.40                            | 299              | 23.43           | -11.21                            | 252              | 24.98           | -11.12                            | 205              | 27.29           | -12.25                            |
| 345              | 22.30           | -10.71                            | 298              | 23.46           | -9.37                             | 251              | 25.02           | -12.00                            | 204              | 27.38           | -11.65                            |
| 344              | 22.32           | -10.49                            | 297              | 23.49           | -10.63                            | 250              | 25.06           | -11.24                            | 203              | 27.46           | -12.16                            |
| 343              | 22.33           | -10.67                            | 296              | 23.51           | -9.13                             | 249              | 25.10           | -12.85                            | 202              | 27.54           | -11.89                            |
| 342              | 22.34           | -10.88                            | 295              | 23.54           | -9.90                             | 248              | 25.14           | -12.03                            | 201              | 27.62           | -12.10                            |
| 341              | 22.35           | -11.23                            | 294              | 23.57           | -9.80                             | 247              | 25.18           | -11.15                            | 200              | 27.71           | -10.54                            |
| 340              | 22.36           | -10.91                            | 293              | 23.59           | -10.93                            | 246              | 25.22           | -11.96                            | 199              | 27.79           | -11.46                            |
| 339              | 22.37           | -11.00                            | 292              | 23.62           | -10.32                            | 245              | 25.26           | -11.46                            | 198              | 27.87           | -11.89                            |
| 338              | 22.38           | -10.91                            | 291              | 23.65           | -10.27                            | 244              | 25.29           | -12.00                            | 197              | 27.95           | -11.47                            |
| 337              | 22.41           | -11.44                            | 290              | 23.67           | -10.03                            | 243              | 25.33           | -11.08                            | 196              | 28.04           | -11.19                            |
| 336              | 22.44           | -11.18                            | 289              | 23.70           | -9.59                             | 242              | 25.37           | -12.14                            | 195              | 28.10           | -11.83                            |
| 335              | 22.46           | -11.04                            | 288              | 23.73           | -9.41                             | 241              | 25.41           | -11.39                            | 194              | 28.15           | -12.36                            |
| 334              | 22.49           | -11.30                            | 287              | 23.75           | -9.65                             | 240              | 25.45           | -11.69                            | 193              | 28.21           | -12.69                            |
| 333              | 22.52           | -10.79                            | 286              | 23.78           | -10.13                            | 239              | 25.49           | -12.28                            | 192              | 28.26           | -11.81                            |
| 332              | 22.54           | -11.58                            | 285              | 23.81           | -10.39                            | 238              | 25.53           | -12.22                            | 191              | 28.31           | -11.51                            |
| 331              | 22.57           | -11.41                            | 284              | 23.83           | -10.30                            | 237              | 25.57           | -12.14                            | 190              | 28.36           | -11.27                            |
| 330              | 22.60           | -10.89                            | 283              | 23.86           | -10.78                            | 236              | 25.61           | -11.50                            | 189              | 28.41           | -10.97                            |
| 329              | 22.62           | -10.91                            | 282              | 23.89           | -9.91                             | 235              | 25.65           | -11.65                            | 188              | 28.47           | -11.85                            |
| 328              | 22.65           | -10.63                            | 281              | 23.92           | -9.46                             | 234              | 25.69           | -11.68                            | 187              | 28.52           | -11.17                            |
| 327              | 22.68           | -11.39                            | 280              | 23.94           | -9.07                             | 233              | 25.72           | -11.31                            | 186              | 28.57           | -11.66                            |
| 326              | 22.71           | -11.39                            | 279              | 23.97           | -9.21                             | 232              | 25.76           | -11.48                            | 185              | 28.62           | -11.93                            |
| 325              | 22.73           | -11.87                            | 278              | 24.00           | -10.55                            | 231              | 25.80           | -11.46                            | 184              | 28.67           | -11.26                            |
| 324              | 22.76           | -11.51                            | 277              | 24.02           | -9.45                             | 230              | 25.84           | -11.93                            | 183              | 28.72           | -11.23                            |
| 323              | 22.79           | -11.53                            | 276              | 24.05           | -10.77                            | 229              | 25.88           | -12.32                            | 183              | 28.72           | -11.08                            |
| 322              | 22.81           | -11.13                            | 275              | 24.08           | -11.24                            | 228              | 25.92           | -11.84                            | 182              | 28.78           | -12.04                            |
| 321              | 22.84           | -10.63                            | 274              | 24.12           | -10.69                            | 227              | 25.96           | -11.52                            | 181              | 28.83           | -11.34                            |
| 320              | 22.87           | -11.23                            | 273              | 24.16           | -10.08                            | 226              | 26.00           | -12.09                            | 180              | 28.88           | -10.95                            |
| 319              | 22.89           | -11.39                            | 272              | 24.20           | -9.67                             | 225              | 26.04           | -11.64                            | 179              | 28.93           | -11.56                            |
| 318              | 22.92           | -11.39                            | 271              | 24.24           | -8.95                             | 224              | 26.08           | -11.63                            | 178              | 28.98           | -11.52                            |
| 317              | 22.95           | -11.61                            | 270              | 24.28           | -10.15                            | 223              | 26.12           | -11.37                            | 177              | 29.04           | -10.92                            |

Continue to next page

Supplementary Table S2 (Cont.)

| Distance (mm) | Age (ky, BP) | $\delta^{18}\text{O}$ (‰,VPDB) | Distance (mm) | Age (ky, BP) | $\delta^{18}\text{O}$ (‰,VPDB) | Distance (mm) | Age (ky, BP) | $\delta^{18}\text{O}$ (‰,VPDB) | Distance (mm) | Age (ky, BP) | $\delta^{18}\text{O}$ (‰,VPDB) |
|---------------|--------------|--------------------------------|---------------|--------------|--------------------------------|---------------|--------------|--------------------------------|---------------|--------------|--------------------------------|
| 176           | 29.09        | -11.68                         | 140           | 34.47        | -10.31                         | 104           | 37.46        | -11.98                         | 68            | 38.38        | -10.19                         |
| 175           | 29.14        | -11.62                         | 139           | 34.57        | -9.87                          | 103           | 37.48        | -11.98                         | 67            | 38.54        | -10.45                         |
| 174           | 29.19        | -12.85                         | 138           | 34.67        | -10.58                         | 102           | 37.50        | -13.44                         | 66            | 38.70        | -11.96                         |
| 173           | 29.43        | -10.44                         | 137           | 34.77        | -10.94                         | 101           | 37.52        | -11.89                         | 65            | 38.86        | -10.02                         |
| 172           | 29.86        | -10.96                         | 136           | 34.88        | -11.50                         | 100           | 37.54        | -13.50                         | 64            | 39.02        | -10.20                         |
| 171           | 30.30        | -10.76                         | 135           | 34.98        | -11.17                         | 99            | 37.56        | -11.69                         | 63            | 39.17        | -10.53                         |
| 170           | 30.73        | -11.15                         | 134           | 35.08        | -11.11                         | 98            | 37.58        | -12.49                         | 62            | 39.33        | -11.37                         |
| 169           | 31.16        | -11.20                         | 133           | 35.18        | -11.50                         | 97            | 37.60        | -12.51                         | 61            | 39.49        | -10.43                         |
| 168           | 31.59        | -10.72                         | 132           | 35.29        | -10.70                         | 96            | 37.62        | -12.21                         | 60            | 39.65        | -10.03                         |
| 167           | 31.69        | -11.25                         | 131           | 35.39        | -10.64                         | 95            | 37.64        | -12.84                         | 59            | 39.81        | -9.94                          |
| 166           | 31.79        | -10.57                         | 130           | 35.49        | -10.80                         | 94            | 37.66        | -11.14                         | 58            | 39.97        | -11.06                         |
| 165           | 31.90        | -11.09                         | 129           | 35.60        | -10.62                         | 93            | 37.68        | -12.79                         | 57            | 40.13        | -11.86                         |
| 164           | 32.00        | -11.18                         | 128           | 35.70        | -11.80                         | 92            | 37.70        | -12.14                         | 56            | 40.29        | -11.67                         |
| 163           | 32.10        | -10.38                         | 127           | 35.80        | -12.34                         | 91            | 37.72        | -12.46                         | 55            | 40.45        | -10.96                         |
| 162           | 32.20        | -10.69                         | 126           | 35.90        | -12.25                         | 90            | 37.74        | -12.60                         | 54            | 40.61        | -11.16                         |
| 161           | 32.31        | -11.09                         | 125           | 36.01        | -12.56                         | 89            | 37.76        | -12.73                         | 53            | 40.76        | -11.40                         |
| 160           | 32.41        | -9.91                          | 124           | 36.11        | -12.12                         | 88            | 37.78        | -12.84                         | 52            | 40.92        | -13.45                         |
| 159           | 32.51        | -10.57                         | 123           | 36.21        | -10.65                         | 87            | 37.80        | -11.29                         | 51            | 41.08        | -11.99                         |
| 158           | 32.62        | -10.18                         | 122           | 36.31        | -11.29                         | 86            | 37.81        | -12.81                         | 50            | 41.24        | -12.26                         |
| 157           | 32.72        | -10.29                         | 121           | 36.42        | -11.34                         | 85            | 37.83        | -11.09                         | 49            | 41.40        | -10.13                         |
| 156           | 32.82        | -10.35                         | 120           | 36.52        | -11.06                         | 84            | 37.85        | -12.04                         | 48            | 41.56        | -10.68                         |
| 155           | 32.92        | -11.69                         | 119           | 36.62        | -9.88                          | 83            | 37.87        | -12.51                         | 47            | 41.72        | -11.39                         |
| 154           | 33.03        | -11.48                         | 118           | 36.73        | -11.13                         | 82            | 37.89        | -12.76                         | 46            | 41.88        | -11.77                         |
| 153           | 33.13        | -10.17                         | 117           | 36.83        | -11.63                         | 81            | 37.91        | -12.51                         | 45            | 42.04        | -11.82                         |
| 152           | 33.23        | -10.94                         | 116           | 36.93        | -12.16                         | 80            | 37.93        | -11.97                         | 44            | 42.20        | -11.62                         |
| 151           | 33.34        | -10.91                         | 115           | 37.03        | -11.68                         | 79            | 37.95        | -12.75                         | 43            | 42.35        | -12.52                         |
| 150           | 33.44        | -10.08                         | 114           | 37.14        | -13.08                         | 78            | 37.97        | -10.99                         | 42            | 42.51        | -11.99                         |
| 149           | 33.54        | -9.98                          | 113           | 37.24        | -11.95                         | 77            | 37.99        | -11.78                         | 41            | 42.67        | -12.60                         |
| 148           | 33.64        | -11.41                         | 112           | 37.30        | -11.20                         | 76            | 38.01        | -11.01                         | 40            | 42.83        | -11.12                         |
| 147           | 33.75        | -10.65                         | 111           | 37.32        | -12.74                         | 75            | 38.03        | -11.33                         | 39            | 42.99        | -11.43                         |
| 146           | 33.85        | -10.62                         | 110           | 37.34        | -13.96                         | 74            | 38.05        | -12.50                         | 38            | 43.15        | -13.33                         |
| 145           | 33.95        | -10.65                         | 109           | 37.36        | -12.78                         | 73            | 38.07        | -11.39                         | 37            | 43.31        | -11.43                         |
| 144           | 34.05        | -10.54                         | 108           | 37.38        | -12.66                         | 72            | 38.09        | -12.86                         | 36            | 43.47        | -11.08                         |
| 143           | 34.16        | -10.52                         | 107           | 37.40        | -13.90                         | 71            | 38.11        | -12.40                         | 35            | 43.63        | -11.95                         |
| 142           | 34.26        | -10.58                         | 106           | 37.42        | -13.85                         | 70            | 38.13        | -12.08                         |               |              |                                |
| 141           | 34.36        | -10.89                         | 105           | 37.44        | -11.89                         | 69            | 38.22        | -11.96                         |               |              |                                |
| <b>XBL-3</b>  |              |                                |               |              |                                |               |              |                                |               |              |                                |
| 1             | 41.42        | -10.87                         | 11            | 40.43        | -10.44                         | 21            | 39.45        | -9.24                          | 33            | 38.46        | -9.78                          |
| 2             | 41.32        | -10.83                         | 12            | 40.33        | -10.22                         | 22            | 39.37        | -8.29                          | 35            | 38.29        | -10.36                         |
| 3             | 41.22        | -10.95                         | 13            | 40.23        | -10.38                         | 23            | 39.29        | -8.51                          | 37            | 38.13        | -10.48                         |
| 4             | 41.12        | -10.92                         | 14            | 40.13        | -10.85                         | 24            | 39.2         | -8.81                          | 39            | 37.93        | -11.42                         |
| 5             | 41.02        | -10.29                         | 15            | 40.03        | -10.81                         | 25            | 39.12        | -9.11                          | 41            | 37.69        | -11.53                         |
| 6             | 40.92        | -10.68                         | 16            | 39.93        | -10.19                         | 26            | 39.04        | -9.07                          | 43            | 37.46        | -11.92                         |
| 7             | 40.82        | -10.25                         | 17            | 39.83        | -10.28                         | 27            | 38.96        | -8.91                          | 45            | 37.22        | -11.89                         |
| 8             | 40.73        | -10.23                         | 18            | 39.73        | -9.96                          | 28            | 38.87        | -8.86                          | 47            | 36.98        | -11.66                         |
| 9             | 40.63        | -9.93                          | 19            | 39.63        | -9.74                          | 29            | 38.79        | -8.75                          | 49            | 36.75        | -11.69                         |
| 10            | 40.53        | -10.17                         | 20            | 39.53        | -9.47                          | 31            | 38.63        | -9.34                          | 51            | 36.51        | -11.53                         |

Continue to next page



Supplementary Table S2 (Cont.)

| Distance (mm) | Age (ky, BP) | $\delta^{18}\text{O}$ (‰,VPDB) | Distance (mm) | Age (ky, BP) | $\delta^{18}\text{O}$ (‰,VPDB) | Distance (mm) | Age (ky, BP) | $\delta^{18}\text{O}$ (‰,VPDB) | Distance (mm) | Age (ky, BP) | $\delta^{18}\text{O}$ (‰,VPDB) |
|---------------|--------------|--------------------------------|---------------|--------------|--------------------------------|---------------|--------------|--------------------------------|---------------|--------------|--------------------------------|
| 53            | 36.27        | -11.59                         | 112           | 34.87        | -11.29                         | 172           | 33.54        | -11.08                         | 232           | 32.47        | -12.47                         |
| 55            | 36.04        | -11.48                         | 114           | 34.82        | -11.01                         | 174           | 33.51        | -11.36                         | 234           | 32.39        | -11.31                         |
| 57            | 36           | -11.22                         | 116           | 34.76        | -11.25                         | 176           | 33.49        | -11.35                         | 236           | 32.32        | -11.92                         |
| 58            | 35.99        | -11.37                         | 118           | 34.71        | -11.34                         | 178           | 33.48        | -11.76                         | 238           | 32.25        | -11.13                         |
| 60            | 35.95        | -11.41                         | 120           | 34.65        | -11.51                         | 180           | 33.46        | -11.85                         | 240           | 32.17        | -11.28                         |
| 62            | 35.91        | -11.18                         | 122           | 34.6         | -10.85                         | 182           | 33.44        | -10.54                         | 242           | 32.1         | -11.67                         |
| 64            | 35.88        | -10.65                         | 124           | 34.55        | -11.08                         | 184           | 33.43        | -11.24                         | 244           | 32.03        | -11.53                         |
| 66            | 35.84        | -10.76                         | 126           | 34.49        | -11.01                         | 186           | 33.41        | -11.53                         | 246           | 31.96        | -11.06                         |
| 68            | 35.81        | -10.59                         | 128           | 34.44        | -11.55                         | 188           | 33.39        | -11.05                         | 248           | 31.88        | -11.78                         |
| 70            | 35.77        | -10.38                         | 130           | 34.38        | -11.12                         | 190           | 33.38        | -10.54                         | 250           | 31.81        | -11.26                         |
| 72            | 35.74        | -10.19                         | 132           | 34.33        | -11.39                         | 192           | 33.36        | -10.96                         | 252           | 31.74        | -12.13                         |
| 74            | 35.7         | -10.27                         | 134           | 34.28        | -11.38                         | 194           | 33.34        | -10.58                         | 254           | 31.65        | -11.49                         |
| 76            | 35.67        | -9.51                          | 136           | 34.24        | -10.9                          | 196           | 33.33        | -10.82                         | 256           | 31.55        | -11.05                         |
| 78            | 35.63        | -10.7                          | 138           | 34.2         | -10.74                         | 198           | 33.31        | -10.61                         | 258           | 31.44        | -11.49                         |
| 80            | 35.6         | -10.35                         | 140           | 34.16        | -11.47                         | 200           | 33.29        | -10.82                         | 260           | 31.34        | -11.79                         |
| 82            | 35.56        | -10.35                         | 142           | 34.13        | -10.38                         | 202           | 33.28        | -10.7                          | 262           | 31.23        | -11.42                         |
| 84            | 35.53        | -10.95                         | 144           | 34.09        | -10.76                         | 204           | 33.26        | -10.6                          | 264           | 31.13        | -11.13                         |
| 86            | 35.49        | -11.13                         | 146           | 34.05        | -11.91                         | 206           | 33.24        | -10.78                         | 266           | 31.03        | -11.91                         |
| 88            | 35.46        | -11.01                         | 148           | 34.01        | -11.67                         | 208           | 33.23        | -11                            | 268           | 30.92        | -11.41                         |
| 90            | 35.42        | -11.88                         | 150           | 33.97        | -11.5                          | 210           | 33.21        | -10.76                         | 270           | 30.82        | -12.3                          |
| 92            | 35.39        | -10.82                         | 152           | 33.93        | -10.98                         | 212           | 33.19        | -10.76                         | 272           | 30.72        | -11.84                         |
| 94            | 35.35        | -12                            | 154           | 33.89        | -11.7                          | 214           | 33.12        | -12.16                         | 274           | 30.61        | -11.4                          |
| 96            | 35.31        | -11.12                         | 156           | 33.85        | -12.4                          | 216           | 33.05        | -12.47                         | 276           | 30.51        | -11.85                         |
| 98            | 35.25        | -11.57                         | 158           | 33.81        | -11.35                         | 218           | 32.98        | -11.85                         | 278           | 30.4         | -11.22                         |
| 100           | 35.2         | -11.72                         | 160           | 33.77        | -11.71                         | 220           | 32.9         | -11.73                         | 280           | 30.3         | -10.09                         |
| 102           | 35.14        | -12.16                         | 162           | 33.73        | -11.6                          | 222           | 32.83        | -12.33                         | 282           | 30.22        | -10.57                         |
| 104           | 35.09        | -11.92                         | 164           | 33.7         | -11.45                         | 224           | 32.76        | -12.23                         | 284           | 30.14        | -10.97                         |
| 106           | 35.03        | -11.38                         | 166           | 33.66        | -11.7                          | 226           | 32.68        | -11.86                         |               |              |                                |
| 108           | 34.98        | -11                            | 168           | 33.62        | -11.72                         | 228           | 32.61        | -11.96                         |               |              |                                |
| 110           | 34.93        | -11.39                         | 170           | 33.58        | -11.23                         | 230           | 32.54        | -11.45                         |               |              |                                |
| <b>XBL-7</b>  |              |                                |               |              |                                |               |              |                                |               |              |                                |
| 2             | 71.00        | -10.68                         | 34            | 70.11        | -10.08                         | 66            | 67.48        | -9.07                          | 98            | 64.68        | -11.74                         |
| 4             | 70.94        | -10.20                         | 36            | 70.05        | -10.31                         | 68            | 67.31        | -9.38                          | 100           | 64.50        | -11.05                         |
| 6             | 70.89        | -9.91                          | 38            | 69.94        | -9.20                          | 70            | 67.13        | -9.49                          | 102           | 64.36        | -10.33                         |
| 8             | 70.83        | -10.31                         | 40            | 69.76        | -9.45                          | 72            | 66.96        | -9.46                          | 104           | 64.22        | -12.83                         |
| 10            | 70.77        | -10.08                         | 42            | 69.59        | -10.11                         | 74            | 66.78        | -9.42                          | 106           | 64.07        | -11.23                         |
| 12            | 70.72        | -9.35                          | 44            | 69.41        | -10.04                         | 76            | 66.61        | -8.86                          | 108           | 63.91        | -11.07                         |
| 14            | 70.66        | -10.09                         | 46            | 69.23        | -9.82                          | 78            | 66.43        | -9.56                          | 110           | 63.75        | -11.12                         |
| 16            | 70.61        | -9.76                          | 48            | 69.06        | -10.51                         | 80            | 66.25        | -10.62                         | 112           | 63.59        | -10.16                         |
| 18            | 70.55        | -9.64                          | 50            | 68.88        | -10.66                         | 82            | 66.08        | -10.75                         | 114           | 63.43        | -10.55                         |
| 20            | 70.50        | -10.59                         | 52            | 68.71        | -10.16                         | 84            | 65.90        | -10.67                         | 116           | 63.27        | -10.90                         |
| 22            | 70.44        | -10.30                         | 54            | 68.53        | -9.70                          | 86            | 65.73        | -11.00                         | 118           | 63.11        | -10.53                         |
| 24            | 70.39        | -9.91                          | 56            | 68.36        | -9.85                          | 88            | 65.55        | -11.01                         | 120           | 62.95        | -10.82                         |
| 26            | 70.33        | -10.73                         | 58            | 68.18        | -10.00                         | 90            | 65.38        | -10.60                         | 122           | 62.79        | -9.92                          |
| 28            | 70.27        | -9.92                          | 60            | 68.01        | -10.42                         | 92            | 65.20        | -10.91                         | 124           | 62.63        | -10.17                         |
| 30            | 70.22        | -10.37                         | 62            | 67.83        | -9.97                          | 94            | 65.03        | -11.39                         | 126           | 62.47        | -10.07                         |
| 32            | 70.16        | -10.03                         | 64            | 67.66        | -9.28                          | 96            | 64.85        | -11.03                         | 128           | 62.31        | -9.68                          |

Continue to next page

Supplementary Table S2 (Cont.)

| Distance (mm) | Age (ky, BP) | $\delta^{18}\text{O}$ (‰,VPDB) | Distance (mm) | Age (ky, BP) | $\delta^{18}\text{O}$ (‰,VPDB) | Distance (mm) | Age (ky, BP) | $\delta^{18}\text{O}$ (‰,VPDB) | Distance (mm) | Age (ky, BP) | $\delta^{18}\text{O}$ (‰,VPDB) |
|---------------|--------------|--------------------------------|---------------|--------------|--------------------------------|---------------|--------------|--------------------------------|---------------|--------------|--------------------------------|
| 130           | 62.15        | -10.15                         | 160           | 61.32        | -10.24                         | 188           | 60.97        | -11.96                         | 216           | 60.27        | -11.27                         |
| 132           | 61.99        | -8.82                          | 162           | 61.30        | -10.45                         | 190           | 60.92        | -11.01                         | 218           | 60.22        | -11.47                         |
| 134           | 61.83        | -11.51                         | 164           | 61.27        | -10.39                         | 192           | 60.87        | -10.65                         | 220           | 60.17        | -11.70                         |
| 136           | 61.67        | -10.71                         | 166           | 61.25        | -10.42                         | 194           | 60.82        | -11.42                         | 222           | 60.12        | -11.73                         |
| 138           | 61.58        | -11.00                         | 168           | 61.23        | -10.62                         | 196           | 60.77        | -11.37                         | 224           | 60.07        | -12.00                         |
| 140           | 61.55        | -10.25                         | 170           | 61.20        | -10.75                         | 198           | 60.72        | -11.07                         | 226           | 60.02        | -11.68                         |
| 142           | 61.53        | -10.79                         | 172           | 61.18        | -10.43                         | 200           | 60.67        | -10.74                         | 228           | 59.97        | -10.37                         |
| 144           | 61.51        | -10.48                         | 174           | 61.16        | -10.94                         | 202           | 60.62        | -10.69                         | 230           | 59.92        | -10.14                         |
| 146           | 61.48        | -10.04                         | 176           | 61.13        | -11.38                         | 204           | 60.57        | -11.48                         | 232           | 59.87        | -10.27                         |
| 148           | 61.46        | -9.50                          | 178           | 61.11        | -11.16                         | 206           | 60.52        | -11.75                         | 234           | 59.82        | -11.50                         |
| 150           | 61.44        | -10.12                         | 180           | 61.09        | -10.97                         | 208           | 60.47        | -11.56                         | 236           | 59.77        | -11.26                         |
| 154           | 61.39        | -10.20                         | 182           | 61.06        | -10.77                         | 210           | 60.42        | -11.42                         | 238           | 59.72        | -11.14                         |
| 156           | 61.37        | -10.28                         | 184           | 61.04        | -11.46                         | 212           | 60.37        | -11.52                         | 240           | 59.67        | -11.30                         |
| 158           | 61.34        | -10.65                         | 186           | 61.02        | -11.13                         | 214           | 60.32        | -10.78                         |               |              |                                |
| <b>XBL-4</b>  |              |                                |               |              |                                |               |              |                                |               |              |                                |
| 2             | 81.951       | -13.73                         | 50            | 81.882       | -14.40                         | 114           | 81.790       | -13.59                         | 168           | 81.081       | -12.94                         |
| 4             | 81.948       | -14.23                         | 52            | 81.879       | -14.58                         | 116           | 81.787       | -14.00                         | 170           | 81.010       | -13.32                         |
| 6             | 81.945       | -14.18                         | 54            | 81.876       | -15.01                         | 118           | 81.784       | -13.60                         | 172           | 80.939       | -13.93                         |
| 7             | 81.943       | -14.09                         | 56            | 81.873       | -14.88                         | 120           | 81.781       | -13.32                         | 171           | 80.974       | -13.46                         |
| 8             | 81.942       | -13.22                         | 58            | 81.870       | -14.33                         | 122           | 81.778       | -13.83                         | 174           | 80.868       | -13.11                         |
| 10            | 81.939       | -13.27                         | 60            | 81.867       | -14.18                         | 124           | 81.776       | -13.96                         | 176           | 80.796       | -13.52                         |
| 12            | 81.936       | -13.46                         | 62            | 81.865       | -14.31                         | 125           | 81.774       | -13.38                         | 177           | 80.761       | -13.43                         |
| 14            | 81.933       | -13.64                         | 64            | 81.862       | -14.19                         | 126           | 81.773       | -13.66                         | 178           | 80.725       | -12.99                         |
| 16            | 81.930       | -14.25                         | 66            | 81.859       | -14.10                         | 127           | 81.771       | -13.71                         | 180           | 80.654       | -13.38                         |
| 18            | 81.928       | -14.27                         | 68            | 81.856       | -14.39                         | 128           | 81.770       | -13.84                         | 182           | 80.583       | -13.98                         |
| 20            | 81.925       | -13.81                         | 70            | 81.853       | -13.92                         | 130           | 81.767       | -13.47                         | 184           | 80.512       | -13.73                         |
| 22            | 81.922       | -13.59                         | 72            | 81.850       | -14.04                         | 132           | 81.764       | -13.73                         | 186           | 80.441       | -14.30                         |
| 24            | 81.919       | -14.01                         | 74            | 81.847       | -14.08                         | 132           | 81.764       | -13.97                         | 187           | 80.405       | -13.79                         |
| 26            | 81.916       | -13.99                         | 76            | 81.844       | -14.14                         | 134           | 81.761       | -14.11                         | 188           | 80.370       | -13.44                         |
| 27            | 81.915       | -13.87                         | 78            | 81.842       | -13.86                         | 136           | 81.758       | -13.84                         | 190           | 80.298       | -14.16                         |
| 28            | 81.913       | -13.46                         | 80            | 81.839       | -13.93                         | 138           | 81.755       | -13.43                         | 192           | 80.227       | -13.56                         |
| 29            | 81.912       | -14.37                         | 82            | 81.836       | -14.50                         | 140           | 81.753       | -13.48                         | 194           | 80.156       | -13.36                         |
| 30            | 81.910       | -14.18                         | 84            | 81.833       | -13.55                         | 142           | 81.750       | -13.41                         | 196           | 80.085       | -13.49                         |
| 31            | 81.909       | -14.01                         | 86            | 81.830       | -13.31                         | 144           | 81.747       | -13.55                         | 198           | 80.014       | -12.92                         |
| 32            | 81.908       | -13.27                         | 88            | 81.827       | -13.90                         | 146           | 81.744       | -13.74                         | 200           | 79.943       | -13.23                         |
| 34            | 81.905       | -13.68                         | 90            | 81.824       | -13.99                         | 148           | 81.741       | -14.18                         | 202           | 79.872       | -13.23                         |
| 36            | 81.902       | -13.89                         | 92            | 81.821       | -14.46                         | 150           | 81.721       | -14.51                         | 204           | 79.773       | -12.82                         |
| 38            | 81.899       | -13.79                         | 94            | 81.819       | -14.22                         | 152           | 81.650       | -13.98                         | 206           | 79.648       | -12.89                         |
| 40            | 81.896       | -14.25                         | 96            | 81.816       | -14.01                         | 154           | 81.579       | -13.18                         | 208           | 79.523       | -12.53                         |
| 41            | 81.895       | -14.08                         | 98            | 81.813       | -13.74                         | 156           | 81.508       | -14.10                         | 209           | 79.460       | -13.07                         |
| 42            | 81.893       | -13.61                         | 100           | 81.810       | -13.69                         | 157           | 81.472       | -13.67                         | 210           | 79.398       | -13.55                         |
| 43            | 81.892       | -14.13                         | 102           | 81.807       | -13.79                         | 158           | 81.437       | -14.15                         | 211           | 79.335       | -12.75                         |
| 44            | 81.890       | -14.37                         | 104           | 81.804       | -14.00                         | 160           | 81.366       | -14.36                         | 212           | 79.272       | -12.49                         |
| 45            | 81.889       | -14.68                         | 106           | 81.801       | -14.10                         | 162           | 81.294       | -13.37                         | 214           | 79.147       | -12.35                         |
| 46            | 81.887       | -13.73                         | 108           | 81.799       | -13.91                         | 163           | 81.259       | -13.93                         | 216           | 79.022       | -12.90                         |
| 47            | 81.886       | -13.71                         | 110           | 81.796       | -14.30                         | 164           | 81.223       | -13.73                         | 218           | 78.897       | -12.73                         |
| 48            | 81.885       | -14.69                         | 112           | 81.793       | -14.02                         | 166           | 81.152       | -13.40                         | 220           | 78.771       | -12.78                         |

Continue to next page

Supplementary Table S2 (Cont.)

| Distance (mm) | Age (ky, BP) | $\delta^{18}\text{O}$ (‰, VPDB) | Distance (mm) | Age (ky, BP) | $\delta^{18}\text{O}$ (‰, VPDB) | Distance (mm) | Age (ky, BP) | $\delta^{18}\text{O}$ (‰, VPDB) | Distance (mm) | Age (ky, BP) | $\delta^{18}\text{O}$ (‰, VPDB) |
|---------------|--------------|---------------------------------|---------------|--------------|---------------------------------|---------------|--------------|---------------------------------|---------------|--------------|---------------------------------|
| 222           | 78.646       | -13.06                          | 236           | 77.769       | -12.68                          | 250           | 75.602       | -11.95                          | 264           | 73.069       | -10.50                          |
| 224           | 78.521       | -13.06                          | 238           | 77.501       | -12.99                          | 252           | 75.285       | -10.80                          | 266           | 72.116       | -10.30                          |
| 226           | 78.396       | -12.93                          | 240           | 77.184       | -12.95                          | 254           | 74.969       | -10.80                          | 268           | 71.164       | -10.17                          |
| 228           | 78.270       | -12.01                          | 242           | 76.868       | -12.37                          | 256           | 74.653       | -11.08                          | 270           | 70.211       | -9.65                           |
| 230           | 78.145       | -12.93                          | 244           | 76.551       | -12.60                          | 258           | 74.336       | -11.12                          | 272           | 60.103       | -9.22                           |
| 232           | 78.020       | -13.19                          | 246           | 76.235       | -13.00                          | 260           | 74.020       | -11.37                          | 274           | 58.761       | -9.40                           |
| 234           | 77.895       | -12.97                          | 248           | 75.918       | -12.68                          | 262           | 73.703       | -11.06                          | 276           | 57.418       | -10.31                          |
| <b>XBL-48</b> |              |                                 |               |              |                                 |               |              |                                 |               |              |                                 |
| 13            | 106.54       | -15.74                          | 48            | 104.85       | -11.55                          | 83            | 93.12        | -10.48                          | 146           | 85.46        | -9.76                           |
| 14            | 106.49       | -15.19                          | 49            | 104.79       | -11.75                          | 84            | 92.44        | -9.88                           | 148           | 85.16        | -9.67                           |
| 15            | 106.45       | -15.14                          | 50            | 104.74       | -11.60                          | 85            | 91.75        | -10.20                          | 150           | 84.86        | -9.63                           |
| 16            | 106.40       | -15.00                          | 51            | 104.68       | -11.44                          | 86            | 91.07        | -9.96                           | 152           | 84.56        | -9.49                           |
| 17            | 106.36       | -15.23                          | 52            | 104.62       | -12.20                          | 87            | 90.71        | -10.29                          | 154           | 84.27        | -9.88                           |
| 18            | 106.32       | -15.04                          | 53            | 104.57       | -11.37                          | 88            | 90.69        | -9.74                           | 156           | 83.97        | -9.78                           |
| 19            | 106.27       | -14.64                          | 54            | 104.51       | -11.92                          | 89            | 90.67        | -9.84                           | 158           | 83.67        | -10.29                          |
| 20            | 106.23       | -15.24                          | 55            | 104.46       | -11.54                          | 90            | 90.64        | -10.34                          | 160           | 83.37        | -9.82                           |
| 21            | 106.19       | -15.27                          | 56            | 104.40       | -10.93                          | 92            | 90.60        | -10.45                          | 161           | 83.22        | -9.76                           |
| 22            | 106.14       | -14.59                          | 57            | 104.35       | -10.80                          | 94            | 90.55        | -10.70                          | 162           | 83.08        | -9.58                           |
| 23            | 106.10       | -14.61                          | 58            | 104.29       | -11.90                          | 96            | 90.50        | -10.60                          | 163           | 82.93        | -9.67                           |
| 24            | 106.06       | -15.32                          | 59            | 104.24       | -11.09                          | 98            | 90.46        | -10.79                          | 164           | 82.78        | -9.93                           |
| 25            | 106.01       | -15.40                          | 60            | 104.18       | -11.78                          | 100           | 90.41        | -10.43                          | 165           | 82.63        | -9.51                           |
| 26            | 105.97       | -15.08                          | 61            | 104.13       | -11.79                          | 102           | 90.27        | -10.33                          | 166           | 82.47        | -12.82                          |
| 27            | 105.93       | -15.14                          | 62            | 104.07       | -11.90                          | 104           | 89.87        | -11.85                          | 167           | 82.30        | -12.16                          |
| 28            | 105.88       | -15.55                          | 63            | 104.02       | -11.64                          | 106           | 89.47        | -11.89                          | 168           | 82.14        | -14.57                          |
| 29            | 105.84       | -15.30                          | 64            | 103.96       | -11.29                          | 108           | 89.15        | -11.80                          | 169           | 81.98        | -13.11                          |
| 30            | 105.80       | -14.73                          | 65            | 103.90       | -12.21                          | 110           | 89.07        | -11.87                          | 170           | 81.82        | -12.93                          |
| 31            | 105.75       | -15.69                          | 66            | 102.83       | -14.13                          | 112           | 88.99        | -12.14                          | 171           | 81.65        | -14.07                          |
| 32            | 105.71       | -15.12                          | 67            | 102.57       | -14.69                          | 114           | 88.91        | -11.41                          | 172           | 81.49        | -13.11                          |
| 33            | 105.67       | -15.48                          | 68            | 102.20       | -14.41                          | 116           | 88.83        | -12.27                          | 174           | 81.17        | -13.39                          |
| 34            | 105.62       | -15.70                          | 69            | 101.83       | -13.54                          | 118           | 88.75        | -11.85                          | 176           | 80.84        | -13.36                          |
| 35            | 105.57       | -15.07                          | 70            | 101.47       | -14.00                          | 120           | 88.67        | -10.84                          | 178           | 80.51        | -12.75                          |
| 36            | 105.51       | -15.12                          | 71            | 101.10       | -13.73                          | 122           | 88.59        | -11.74                          | 180           | 80.19        | -13.32                          |
| 37            | 105.46       | -14.55                          | 72            | 100.73       | -13.26                          | 124           | 88.51        | -10.27                          | 182           | 79.86        | -13.11                          |
| 38            | 105.40       | -13.96                          | 73            | 100.37       | -14.25                          | 126           | 88.43        | -9.68                           | 184           | 79.54        | -12.44                          |
| 39            | 105.34       | -14.93                          | 74            | 99.63        | -12.65                          | 128           | 88.13        | -10.30                          | 186           | 79.21        | -11.71                          |
| 40            | 105.29       | -15.06                          | 75            | 98.90        | -12.18                          | 130           | 87.83        | -9.54                           | 188           | 78.89        | -12.59                          |
| 41            | 105.23       | -14.93                          | 76            | 98.16        | -11.90                          | 132           | 87.54        | -9.52                           | 190           | 78.56        | -12.31                          |
| 42            | 105.18       | -14.55                          | 77            | 97.43        | -12.19                          | 134           | 87.24        | -9.96                           | 192           | 78.24        | -12.26                          |
| 43            | 105.12       | -12.58                          | 78            | 96.69        | -11.85                          | 136           | 86.94        | -9.98                           | 194           | 77.91        | -12.61                          |
| 44            | 105.07       | -12.11                          | 79            | 95.96        | -11.00                          | 138           | 86.64        | -10.35                          | 196           | 77.59        | -12.62                          |
| 45            | 105.01       | -10.98                          | 80            | 95.22        | -10.77                          | 140           | 86.35        | -10.32                          | 198           | 77.26        | -12.22                          |
| 46            | 104.96       | -12.31                          | 81            | 94.49        | -10.84                          | 142           | 86.05        | -10.46                          | 200           | 76.94        | -12.39                          |
| 47            | 104.90       | -11.78                          | 82            | 93.80        | -10.64                          | 144           | 85.75        | -10.44                          | 202           | 76.61        | -11.11                          |
| <b>XBL-65</b> |              |                                 |               |              |                                 |               |              |                                 |               |              |                                 |
| 35            | 170.73       | -14.15                          | 38            | 170.66       | -15.17                          | 44            | 170.52       | -13.78                          | 48            | 170.42       | -14.31                          |
| 36            | 170.71       | -14.55                          | 40            | 170.62       | -14.81                          | 45            | 170.50       | -14.51                          | 50            | 170.38       | -14.60                          |
| 37            | 170.69       | -14.56                          | 42            | 170.57       | -14.43                          | 46            | 170.47       | -13.57                          | 52            | 170.33       | -14.17                          |

Continue to next page

Supplementary Table S2 (Cont.)

| Distance (mm) | Age (ky, BP) | $\delta^{18}\text{O}$ (‰,VPDB) | Distance (mm) | Age (ky, BP) | $\delta^{18}\text{O}$ (‰,VPDB) | Distance (mm) | Age (ky, BP) | $\delta^{18}\text{O}$ (‰,VPDB) | Distance (mm) | Age (ky, BP) | $\delta^{18}\text{O}$ (‰,VPDB) |
|---------------|--------------|--------------------------------|---------------|--------------|--------------------------------|---------------|--------------|--------------------------------|---------------|--------------|--------------------------------|
| 54            | 170.28       | -14.57                         | 108           | 169.84       | -13.92                         | 160           | 168.76       | -12.65                         | 212           | 168.61       | -11.52                         |
| 55            | 170.26       | -13.70                         | 110           | 169.79       | -13.25                         | 162           | 168.75       | -11.97                         | 214           | 168.61       | -12.34                         |
| 56            | 170.23       | -13.24                         | 112           | 169.73       | -13.49                         | 164           | 168.75       | -13.31                         | 215           | 168.59       | -12.38                         |
| 58            | 170.18       | -14.22                         | 114           | 169.68       | -13.95                         | 165           | 168.74       | -11.59                         | 216           | 168.56       | -11.41                         |
| 60            | 170.14       | -14.37                         | 115           | 169.65       | -14.14                         | 166           | 168.74       | -11.70                         | 218           | 168.51       | -11.27                         |
| 65            | 170.02       | -12.89                         | 116           | 169.62       | -13.44                         | 168           | 168.74       | -11.77                         | 220           | 168.45       | -11.61                         |
| 66            | 170.00       | -13.61                         | 118           | 169.57       | -13.96                         | 170           | 168.73       | -11.76                         | 222           | 168.40       | -11.33                         |
| 68            | 170.00       | -13.80                         | 120           | 169.51       | -14.02                         | 172           | 168.73       | -11.94                         | 224           | 168.34       | -11.92                         |
| 70            | 170.00       | -14.26                         | 122           | 169.46       | -14.63                         | 174           | 168.72       | -12.54                         | 225           | 168.32       | -11.34                         |
| 72            | 170.00       | -12.94                         | 124           | 169.41       | -14.51                         | 175           | 168.72       | -12.11                         | 226           | 168.29       | -11.59                         |
| 74            | 170.00       | -14.75                         | 125           | 169.38       | -13.69                         | 176           | 168.71       | -11.67                         | 228           | 168.23       | -11.99                         |
| 75            | 169.99       | -14.09                         | 126           | 169.35       | -13.27                         | 178           | 168.71       | -11.12                         | 230           | 168.18       | -11.74                         |
| 76            | 169.99       | -13.81                         | 128           | 169.30       | -13.79                         | 180           | 168.70       | -11.94                         | 232           | 168.12       | -12.11                         |
| 78            | 169.99       | -14.49                         | 130           | 169.24       | -13.42                         | 182           | 168.70       | -11.05                         | 234           | 168.07       | -12.04                         |
| 80            | 169.99       | -13.62                         | 132           | 169.19       | -13.00                         | 184           | 168.69       | -12.05                         | 235           | 168.04       | -12.07                         |
| 82            | 169.99       | -14.63                         | 134           | 169.14       | -13.49                         | 185           | 168.69       | -12.00                         | 236           | 168.02       | -11.54                         |
| 84            | 169.98       | -13.32                         | 135           | 169.11       | -13.87                         | 186           | 168.69       | -11.43                         | 238           | 167.96       | -12.76                         |
| 85            | 169.98       | -13.82                         | 136           | 169.08       | -13.76                         | 188           | 168.68       | -12.00                         | 240           | 167.91       | -12.57                         |
| 86            | 169.98       | -13.70                         | 138           | 169.03       | -13.46                         | 190           | 168.67       | -12.21                         | 242           | 167.85       | -12.27                         |
| 88            | 169.98       | -13.65                         | 140           | 168.97       | -14.03                         | 192           | 168.67       | -11.81                         | 244           | 167.80       | -12.37                         |
| 90            | 169.98       | -13.84                         | 142           | 168.92       | -13.80                         | 194           | 168.66       | -11.42                         | 245           | 167.74       | -12.44                         |
| 92            | 169.97       | -13.58                         | 144           | 168.87       | -13.00                         | 195           | 168.66       | -11.27                         | 246           | 167.69       | -11.94                         |
| 94            | 169.97       | -13.51                         | 145           | 168.84       | -13.55                         | 196           | 168.66       | -12.34                         | 248           | 167.63       | -12.42                         |
| 95            | 169.97       | -13.81                         | 146           | 168.81       | -13.64                         | 198           | 168.65       | -12.12                         | 250           | 167.58       | -11.62                         |
| 96            | 169.97       | -13.69                         | 148           | 168.79       | -14.13                         | 200           | 168.65       | -11.81                         | 252           | 167.52       | -12.30                         |
| 98            | 169.97       | -13.39                         | 150           | 168.79       | -14.50                         | 202           | 168.64       | -12.59                         | 254           | 167.47       | -11.90                         |
| 100           | 169.97       | -13.85                         | 152           | 168.78       | -13.11                         | 204           | 168.63       | -12.15                         | 255           | 167.41       | -11.45                         |
| 102           | 169.96       | -13.78                         | 154           | 168.78       | -13.02                         | 205           | 168.63       | -12.23                         | 256           | 167.36       | -12.12                         |
| 104           | 169.95       | -13.31                         | 155           | 168.77       | -11.88                         | 206           | 168.63       | -12.71                         | 258           | 167.30       | -11.04                         |
| 105           | 169.92       | -13.75                         | 156           | 168.77       | -12.27                         | 208           | 168.62       | -12.67                         | 260           | 167.25       | -9.74                          |
| 106           | 169.89       | -13.37                         | 158           | 168.76       | -11.36                         | 210           | 168.62       | -11.45                         |               |              |                                |
| <b>XBL-27</b> |              |                                |               |              |                                |               |              |                                |               |              |                                |
| 4             | 189.46       | -9.87                          | 64            | 185.19       | -10.34                         | 124           | 183.98       | -10.28                         | 184           | 180.79       | -11.02                         |
| 8             | 189.06       | -10.35                         | 68            | 185.11       | -10.23                         | 128           | 183.79       | -9.99                          | 188           | 180.53       | -10.68                         |
| 12            | 188.66       | -9.30                          | 72            | 185.04       | -9.85                          | 132           | 183.6        | -10.30                         | 192           | 180.26       | -13.43                         |
| 16            | 188.26       | -10.71                         | 76            | 184.97       | -9.80                          | 136           | 183.4        | -9.71                          | 196           | 180          | -14.04                         |
| 20            | 187.87       | -10.41                         | 80            | 184.89       | -10.36                         | 140           | 183.21       | -9.80                          | 200           | 179.74       | -14.25                         |
| 24            | 187.47       | -10.09                         | 84            | 184.82       | -10.25                         | 144           | 183.02       | -10.28                         | 202           | 179.6        | -13.76                         |
| 28            | 187.07       | -9.75                          | 88            | 184.74       | -10.10                         | 148           | 182.82       | -10.19                         | 204           | 179.47       | -12.85                         |
| 32            | 186.68       | -9.79                          | 92            | 184.67       | -9.84                          | 152           | 182.63       | -9.36                          | 208           | 179.21       | -12.84                         |
| 36            | 186.28       | -9.86                          | 96            | 184.59       | -9.71                          | 156           | 182.44       | -11.12                         | 212           | 178.95       | -12.91                         |
| 40            | 185.88       | -9.90                          | 100           | 184.52       | -10.31                         | 160           | 182.25       | -11.14                         | 216           | 178.78       | -13.56                         |
| 44            | 185.56       | -10.55                         | 104           | 184.44       | -10.32                         | 164           | 182.05       | -10.61                         | 220           | 178.63       | -13.33                         |
| 48            | 185.49       | -9.75                          | 108           | 184.37       | -9.13                          | 168           | 181.84       | -10.97                         | 224           | 178.49       | -12.76                         |
| 52            | 185.41       | -10.16                         | 112           | 184.29       | -10.07                         | 172           | 181.58       | -9.65                          | 228           | 178.35       | -13.07                         |
| 56            | 185.34       | -10.29                         | 116           | 184.22       | -9.77                          | 176           | 181.32       | -9.50                          | 232           | 178.21       | -12.63                         |
| 60            | 185.26       | -10.33                         | 120           | 184.14       | -9.60                          | 180           | 181.05       | -9.11                          | 236           | 178.07       | -12.60                         |

Continue to next page

Supplementary Table S2 (Cont.)

| Distance (mm) | Age (ky, BP) | $\delta^{18}\text{O}$ (‰,VPDB) | Distance (mm) | Age (ky, BP) | $\delta^{18}\text{O}$ (‰,VPDB) | Distance (mm) | Age (ky, BP) | $\delta^{18}\text{O}$ (‰,VPDB) | Distance (mm) | Age (ky, BP) | $\delta^{18}\text{O}$ (‰,VPDB) |
|---------------|--------------|--------------------------------|---------------|--------------|--------------------------------|---------------|--------------|--------------------------------|---------------|--------------|--------------------------------|
| 240           | 177.92       | -14.00                         | 272           | 176.95       | -13.42                         | 304           | 176.73       | -12.70                         | 336           | 174.39       | -13.95                         |
| 244           | 177.78       | -12.38                         | 276           | 176.94       | -13.34                         | 308           | 176.44       | -12.31                         | 340           | 174.1        | -13.70                         |
| 248           | 177.64       | -12.19                         | 280           | 176.93       | -12.61                         | 312           | 176.14       | -12.96                         | 344           | 173.8        | -13.96                         |
| 252           | 177.5        | -13.30                         | 284           | 176.92       | -13.34                         | 316           | 175.85       | -12.33                         | 348           | 173.51       | -14.71                         |
| 256           | 177.35       | -13.00                         | 288           | 176.91       | -13.20                         | 320           | 175.56       | -14.00                         | 352           | 173.22       | -13.56                         |
| 260           | 177.21       | -12.98                         | 292           | 176.9        | -14.54                         | 324           | 175.27       | -14.67                         | 356           | 172.93       | -13.78                         |
| 264           | 177.07       | -13.91                         | 296           | 176.89       | -12.55                         | 328           | 174.97       | -13.81                         | 360           | 172.63       | -14.99                         |
| 268           | 176.96       | -13.45                         | 300           | 176.88       | -11.98                         | 332           | 174.68       | -13.58                         | 364           | 172.34       | -13.23                         |
| <b>XBL-26</b> |              |                                |               |              |                                |               |              |                                |               |              |                                |
| 2             | 251.96       | -11.53                         | 78            | 240.63       | -11.75                         | 154           | 223.32       | -11.32                         | 230           | 201.59       | -10.33                         |
| 4             | 251.79       | -12.82                         | 80            | 240.36       | -14.15                         | 156           | 223.22       | -11.35                         | 232           | 201.56       | -9.41                          |
| 6             | 251.61       | -11.62                         | 82            | 240.09       | -13.73                         | 158           | 223.11       | -11.04                         | 234           | 201.53       | -9.28                          |
| 8             | 251.43       | -10.38                         | 84            | 239.88       | -13.84                         | 160           | 223.01       | -12.65                         | 236           | 201.50       | -9.12                          |
| 10            | 251.26       | -12.83                         | 86            | 239.67       | -14.50                         | 162           | 222.90       | -13.31                         | 238           | 201.47       | -9.78                          |
| 12            | 251.08       | -12.14                         | 88            | 239.46       | -12.48                         | 164           | 222.80       | -12.46                         | 240           | 201.45       | -9.11                          |
| 14            | 250.91       | -12.10                         | 90            | 239.25       | -13.27                         | 166           | 222.69       | -11.94                         | 242           | 201.42       | -9.39                          |
| 16            | 250.73       | -11.63                         | 92            | 239.04       | -13.60                         | 168           | 222.59       | -11.80                         | 244           | 201.39       | -8.87                          |
| 18            | 250.55       | -11.76                         | 94            | 238.83       | -13.13                         | 170           | 222.48       | -11.71                         | 246           | 201.36       | -9.28                          |
| 20            | 250.38       | -12.13                         | 96            | 238.62       | -12.72                         | 172           | 222.38       | -11.83                         | 248           | 201.34       | -9.62                          |
| 22            | 250.20       | -12.54                         | 98            | 238.41       | -12.97                         | 174           | 217.17       | -11.68                         | 250           | 201.31       | -9.32                          |
| 24            | 250.03       | -11.98                         | 100           | 238.20       | -13.29                         | 176           | 216.81       | -12.19                         | 252.7         | 201.23       | -8.69                          |
| 26            | 249.85       | -12.15                         | 102           | 237.99       | -13.00                         | 178           | 216.46       | -11.21                         | 253.4         | 201.20       | -8.91                          |
| 28            | 249.67       | -11.64                         | 104           | 237.78       | -12.77                         | 180           | 216.10       | -11.87                         | 254           | 201.17       | -9.03                          |
| 30            | 249.50       | -10.67                         | 106           | 237.57       | -13.67                         | 182           | 215.74       | -11.82                         | 254.7         | 201.14       | -8.99                          |
| 32            | 249.32       | -10.03                         | 108           | 237.36       | -12.43                         | 184           | 215.38       | -10.73                         | 255.4         | 201.11       | -9.17                          |
| 34            | 249.15       | -10.84                         | 110           | 237.15       | -12.89                         | 186           | 215.02       | -11.50                         | 256           | 201.08       | -8.79                          |
| 36            | 248.97       | -10.49                         | 112           | 236.94       | -12.62                         | 188           | 214.66       | -11.21                         | 256.7         | 201.05       | -9.04                          |
| 38            | 248.79       | -10.30                         | 114           | 236.73       | -12.89                         | 190           | 214.30       | -12.51                         | 257.4         | 201.02       | -9.39                          |
| 40            | 248.49       | -9.85                          | 116           | 236.52       | -12.81                         | 192           | 204.41       | -9.82                          | 258           | 201.00       | -8.99                          |
| 42            | 248.06       | -9.85                          | 118           | 236.31       | -13.23                         | 194           | 204.14       | -9.41                          | 258.7         | 200.96       | -8.72                          |
| 44            | 247.63       | -10.36                         | 120           | 236.10       | -13.68                         | 196           | 203.87       | -9.48                          | 259.4         | 200.93       | -8.93                          |
| 46            | 247.20       | -10.18                         | 122           | 235.89       | -12.90                         | 198           | 203.60       | -8.81                          | 260           | 200.91       | -8.82                          |
| 48            | 246.77       | -9.85                          | 124           | 235.68       | -12.79                         | 200           | 203.33       | -9.29                          | 260.7         | 200.88       | -8.61                          |
| 50            | 246.34       | -9.76                          | 126           | 234.45       | -12.81                         | 202           | 203.06       | -9.02                          | 261.4         | 200.85       | -8.15                          |
| 52            | 245.91       | -10.05                         | 128           | 232.20       | -9.51                          | 204           | 202.79       | -9.60                          | 262           | 200.82       | -8.70                          |
| 54            | 245.48       | -9.81                          | 130           | 229.95       | -10.09                         | 206           | 202.52       | -9.67                          | 262.7         | 199.97       | -8.57                          |
| 56            | 245.05       | -9.41                          | 132           | 227.69       | -10.76                         | 208           | 202.26       | -9.95                          | 263.4         | 199.12       | -15.87                         |
| 58            | 244.62       | -8.96                          | 134           | 225.44       | -10.87                         | 210           | 201.99       | -10.53                         | 264           | 198.39       | -15.77                         |
| 60            | 244.19       | -9.67                          | 136           | 224.26       | -10.25                         | 212           | 201.84       | -9.84                          | 264.7         | 197.54       | -14.74                         |
| 62            | 243.76       | -9.54                          | 138           | 224.16       | -11.57                         | 214           | 201.81       | -10.26                         | 265.4         | 196.69       | -14.20                         |
| 64            | 243.33       | -8.85                          | 140           | 224.05       | -11.51                         | 216           | 201.78       | -10.17                         | 266           | 195.96       | -14.95                         |
| 66            | 242.90       | -8.70                          | 142           | 223.95       | -10.52                         | 218           | 201.75       | -10.06                         | 266.7         | 195.11       | -15.70                         |
| 68            | 242.47       | -8.57                          | 144           | 223.85       | -10.78                         | 220           | 201.73       | -10.12                         | 267.4         | 194.26       | -14.23                         |
| 70            | 242.04       | -7.89                          | 146           | 223.74       | -10.65                         | 222           | 201.70       | -10.21                         | 268           | 193.53       | -15.86                         |
| 72            | 241.61       | -8.99                          | 148           | 223.64       | -11.44                         | 224           | 201.67       | -9.36                          | 268.7         | 192.68       | -15.64                         |
| 74            | 241.18       | -9.43                          | 150           | 223.53       | -11.43                         | 226           | 201.64       | -9.60                          | 269.4         | 191.82       | -15.85                         |
| 76            | 240.90       | -8.66                          | 152           | 223.43       | -11.09                         | 228           | 201.61       | -10.06                         | 270           | 191.10       | -16.01                         |

Continue to next page

Supplementary Table S2 (Cont.)

| Distance (mm) | Age (ky, BP) | $\delta^{18}\text{O}$ (‰, VPDB) | Distance (mm) | Age (ky, BP) | $\delta^{18}\text{O}$ (‰, VPDB) | Distance (mm) | Age (ky, BP) | $\delta^{18}\text{O}$ (‰, VPDB) | Distance (mm) | Age (ky, BP) | $\delta^{18}\text{O}$ (‰, VPDB) |
|---------------|--------------|---------------------------------|---------------|--------------|---------------------------------|---------------|--------------|---------------------------------|---------------|--------------|---------------------------------|
| 270.7         | 190.24       | -15.43                          | 304           | 186.61       | -10.20                          | 398           | 180.33       | -9.59                           | 475.5         | 160.34       | -10.74                          |
| 271.4         | 189.39       | -12.80                          | 306           | 186.49       | -10.89                          | 400           | 180.19       | -9.88                           | 476           | 160.00       | -10.5                           |
| 272           | 188.66       | -9.83                           | 308           | 186.36       | -11.13                          | 402           | 180.04       | -10.54                          | 476.5         | 159.66       | -10.74                          |
| 272.7         | 188.62       | -9.70                           | 310           | 186.23       | -10.25                          | 404           | 179.90       | -9.69                           | 477           | 159.31       | -10.43                          |
| 273.4         | 188.57       | -10.06                          | 312           | 186.10       | -10.43                          | 406           | 179.75       | -9.34                           | 477.5         | 158.97       | -10.66                          |
| 274           | 188.54       | -10.02                          | 314           | 185.97       | -10.48                          | 408           | 175.36       | -13.38                          | 478           | 158.63       | -10.33                          |
| 274.7         | 188.49       | -9.93                           | 316           | 185.84       | -10.72                          | 410           | 175.22       | -12.86                          | 478.5         | 158.29       | -10.58                          |
| 275.4         | 188.45       | -9.71                           | 318           | 185.72       | -11.38                          | 412           | 175.08       | -12.22                          | 479           | 157.95       | -10.53                          |
| 276           | 188.41       | -9.27                           | 320           | 185.59       | -10.78                          | 414           | 174.93       | -13.10                          | 479.5         | 157.60       | -10.62                          |
| 276.7         | 188.36       | -9.24                           | 322           | 185.46       | -9.73                           | 416           | 174.79       | -11.74                          | 480           | 157.26       | -9.84                           |
| 277.4         | 188.32       | -10.29                          | 324           | 185.33       | -10.16                          | 418           | 174.64       | -11.94                          | 480.5         | 156.92       | -10.03                          |
| 278           | 188.28       | -11.39                          | 326           | 185.20       | -10.57                          | 420           | 174.50       | -12.66                          | 481           | 156.58       | -9.87                           |
| 278.7         | 188.23       | -10.85                          | 328           | 185.08       | -10.53                          | 422           | 174.36       | -12.41                          | 481.5         | 156.23       | -9.9                            |
| 279.4         | 188.19       | -11.61                          | 330           | 184.95       | -10.15                          | 424           | 174.21       | -13.01                          | 482           | 155.89       | -9.71                           |
| 280           | 188.15       | -11.12                          | 332           | 184.82       | -10.27                          | 426           | 174.07       | -11.82                          | 482.5         | 155.55       | -9.88                           |
| 280.7         | 188.11       | -10.96                          | 334           | 184.69       | -11.55                          | 428           | 173.93       | -12.30                          | 483           | 155.21       | -10.68                          |
| 281.4         | 188.06       | -11.05                          | 336           | 184.56       | -11.92                          | 430           | 173.78       | -12.74                          | 483.5         | 154.86       | -10.42                          |
| 282           | 188.02       | -11.32                          | 338           | 184.43       | -11.18                          | 431           | 173.71       | -12.86                          | 484           | 154.52       | -10.15                          |
| 282.7         | 187.98       | -11.03                          | 340           | 184.31       | -10.70                          | 432           | 173.64       | -15.48                          | 484.5         | 154.18       | -10.63                          |
| 283.4         | 187.93       | -11.68                          | 342           | 184.18       | -10.85                          | 433           | 173.57       | -13.26                          | 485           | 153.84       | -11.01                          |
| 284           | 187.90       | -10.97                          | 344           | 184.05       | -10.32                          | 434           | 173.49       | -13.18                          | 485.5         | 153.49       | -10.2                           |
| 284.7         | 187.85       | -11.61                          | 346           | 183.92       | -10.85                          | 436           | 173.35       | -12.93                          | 486           | 153.15       | -9.82                           |
| 285.4         | 187.81       | -11.45                          | 348           | 183.79       | -10.14                          | 438           | 173.21       | -14.30                          | 486.5         | 152.81       | -10.74                          |
| 286           | 187.77       | -10.93                          | 350           | 183.67       | -11.40                          | 440           | 173.06       | -13.03                          | 487           | 152.47       | -11.09                          |
| 286.7         | 187.72       | -11.28                          | 352           | 183.54       | -10.46                          | 442           | 172.92       | -13.00                          | 487.5         | 152.13       | -11.15                          |
| 287.4         | 187.68       | -10.66                          | 354           | 183.41       | -11.13                          | 444           | 172.77       | -13.79                          | 488           | 151.78       | -10.95                          |
| 288           | 187.64       | -10.97                          | 356           | 183.28       | -10.87                          | 446           | 172.63       | -14.27                          | 488.5         | 151.44       | -10.42                          |
| 288.7         | 187.59       | -10.22                          | 358           | 183.15       | -11.75                          | 448           | 172.49       | -14.59                          | 489           | 151.10       | -10.86                          |
| 289.4         | 187.55       | -11.10                          | 360           | 183.02       | -11.27                          | 450           | 172.34       | -15.79                          | 489.5         | 150.76       | -11.58                          |
| 290           | 187.51       | -11.28                          | 362           | 182.90       | -9.42                           | 452           | 172.20       | -14.20                          | 490           | 150.41       | -11.2                           |
| 290.7         | 187.47       | -10.67                          | 364           | 182.77       | -10.27                          | 454           | 172.06       | -13.62                          | 490.5         | 150.07       | -11.29                          |
| 291.4         | 187.42       | -11.47                          | 366           | 182.64       | -9.63                           | 456           | 171.91       | -13.96                          | 491           | 149.73       | -11.83                          |
| 292           | 187.38       | -10.59                          | 368           | 182.50       | -10.08                          | 458           | 171.77       | -13.97                          | 491.5         | 149.39       | -11.45                          |
| 292.7         | 187.34       | -10.82                          | 370           | 182.35       | -11.03                          | 460           | 171.62       | -14.82                          | 492           | 149.04       | -11.08                          |
| 293.4         | 187.29       | -10.42                          | 372           | 182.21       | -9.32                           | 462           | 171.48       | -14.49                          | 492.5         | 148.70       | -10.92                          |
| 294           | 187.25       | -10.58                          | 374           | 182.06       | -11.43                          | 464           | 171.34       | -14.90                          | 493           | 148.36       | -10.29                          |
| 294.7         | 187.21       | -9.82                           | 376           | 181.92       | -10.56                          | 466           | 171.19       | -15.02                          | 493.5         | 148.02       | -10.56                          |
| 295.4         | 187.16       | -10.64                          | 378           | 181.77       | -10.27                          | 468           | 171.05       | -16.04                          | 494           | 147.67       | -10.39                          |
| 296           | 187.13       | -10.56                          | 380           | 181.63       | -9.37                           | 470           | 164.11       | -10.14                          | 494.5         | 147.33       | -10.85                          |
| 296.7         | 187.08       | -11.76                          | 382           | 181.49       | -10.66                          | 471.5         | 163.08       | -10.63                          | 495           | 146.99       | -10.91                          |
| 297.4         | 187.04       | -10.39                          | 384           | 181.34       | -9.79                           | 472           | 162.74       | -10.39                          | 495.5         | 146.65       | -10.88                          |
| 298           | 187.00       | -10.60                          | 386           | 181.20       | -10.24                          | 472.5         | 162.40       | -10.63                          | 496           | 146.31       | -10.57                          |
| 298.7         | 186.95       | -11.33                          | 388           | 181.05       | -10.09                          | 473           | 162.05       | -11.44                          | 496.5         | 145.96       | -10.58                          |
| 299.4         | 186.91       | -10.64                          | 390           | 180.91       | -10.53                          | 473.5         | 161.71       | -10.77                          | 497           | 145.62       | -9.56                           |
| 300           | 186.87       | -9.98                           | 392           | 180.76       | -10.08                          | 474           | 161.37       | -10.39                          | 497.5         | 145.28       | -10.41                          |
| 300.7         | 186.83       | -9.45                           | 394           | 180.62       | -9.91                           | 474.5         | 161.03       | -11.01                          | 498           | 144.94       | -10.61                          |
| 302           | 186.74       | -9.34                           | 396           | 180.48       | -10.32                          | 475           | 160.68       | -10.46                          | 498.5         | 144.59       | -10.57                          |

Continue to next page

Supplementary Table S2 (Cont.)

| Distance<br>(mm) | Age<br>(ky, BP) | $\delta^{18}\text{O}$<br>(‰,VPDB) |
|------------------|-----------------|-----------------------------------|------------------|-----------------|-----------------------------------|------------------|-----------------|-----------------------------------|------------------|-----------------|-----------------------------------|
| 499              | 144.25          | -10.7                             | 508.5            | 136.84          | -10.86                            | 518              | 128.41          | -14                               | 527.5            | 108.50          | -15.98                            |
| 499.5            | 143.91          | -10.56                            | 509              | 136.39          | -11                               | 518.5            | 127.97          | -15.78                            | 528              | 106.42          | -17.21                            |
| 500              | 143.57          | -11.43                            | 509.5            | 135.95          | -10.18                            | 519              | 127.53          | -14.85                            | 528.5            | 104.33          | -16.7                             |
| 500.5            | 143.22          | -11.24                            | 510              | 135.51          | -10.39                            | 519.5            | 127.08          | -14.37                            | 529              | 102.25          | -15.14                            |
| 501              | 142.88          | -11.39                            | 510.5            | 135.06          | -9.94                             | 520              | 126.64          | -14.41                            | 529.5            | 100.16          | -14.53                            |
| 501.5            | 142.54          | -11.32                            | 511              | 134.62          | -10.21                            | 520.5            | 126.20          | -16.55                            | 530              | 98.08           | -13.85                            |
| 502              | 142.20          | -11.05                            | 511.5            | 134.18          | -10.76                            | 521              | 125.75          | -15.39                            | 530.5            | 95.99           | -11.37                            |
| 502.5            | 141.85          | -10.97                            | 512              | 133.73          | -10.25                            | 521.5            | 125.31          | -15.94                            | 531              | 93.91           | -11.32                            |
| 503              | 141.51          | -11.14                            | 512.5            | 133.29          | -10.64                            | 522              | 124.87          | -14.46                            | 531.5            | 91.82           | -9.78                             |
| 503.5            | 141.17          | -10.75                            | 513              | 132.85          | -10.31                            | 522.5            | 124.42          | -17.27                            | 532              | 89.74           | -10.21                            |
| 504              | 140.83          | -10.59                            | 513.5            | 132.40          | -10.37                            | 523              | 123.98          | -17.78                            | 532.5            | 87.65           | -12.82                            |
| 504.5            | 140.38          | -10.98                            | 514              | 131.96          | -10.35                            | 523.5            | 123.54          | -16.2                             | 533              | 85.57           | -10.39                            |
| 505              | 139.94          | -10.49                            | 514.5            | 131.52          | -9.61                             | 524              | 123.09          | -16.17                            | 533.5            | 83.49           | -10.61                            |
| 505.5            | 139.50          | -11.14                            | 515              | 131.07          | -10.03                            | 524.5            | 121.01          | -14.38                            | 534              | 81.40           | -10.12                            |
| 506              | 139.05          | -10.99                            | 515.5            | 130.63          | -10.48                            | 525              | 118.92          | -14.24                            | 534.5            | 79.32           | -12.67                            |
| 506.5            | 138.61          | -11.05                            | 516              | 130.19          | -10.12                            | 525.5            | 116.84          | -14                               | 535              | 77.23           | -11.83                            |
| 507              | 138.17          | -10.43                            | 516.5            | 129.74          | -9.59                             | 526              | 114.75          | -14.73                            | 535.5            | 75.15           | -10.26                            |
| 507.5            | 137.72          | -10.67                            | 517              | 129.30          | -9.85                             | 526.5            | 112.67          | -16.47                            | 536              | 73.06           | -10.08                            |
| 508              | 137.28          | -10.3                             | 517.5            | 128.86          | -10.47                            | 527              | 110.58          | -14.86                            |                  |                 |                                   |
